# Supplementary material for: Simple sequence repeats drive genome plasticity and promote adaptive evolution in penaeid shrimp
Source: PubMed Central journal article supplement (PMC7878876; doi:10.1038/s42003-021-01716-y), 2021-02-11
Supplement: 42003_2021_1716_MOESM2_ESM.pdf [file 42003_2021_1716_MOESM2_ESM.pdf]

Supplementary Information for

## **Simple sequence repeats drive genome plasticity and promote adaptive evolution in penaeid shrimp**

Jianbo Yuan<sup>1,2,3\*</sup>, Xiaojun Zhang<sup>1,2,3\*</sup>, Min Wang<sup>4,5\*</sup>, Yamin Sun<sup>6</sup>, Chengzhang Liu<sup>1,2,3</sup>, Shihao Li<sup>1,2,3</sup>, Yang Yu<sup>1,2,3</sup>, Yi Gao<sup>1,2,3</sup>, Fei Liu<sup>1,2,3</sup>, Xiaoxi Zhang<sup>1</sup>, Jie Kong<sup>7</sup>, Guangyi Fan<sup>8</sup>, Chengsong Zhang<sup>1,2,3</sup>, Lu Feng<sup>4,5\*\*</sup>, Jianhai Xiang<sup>1,2,3\*\*</sup>, Fuhua Li<sup>1,2,3\*\*</sup>

<sup>1</sup>CAS Key Laboratory of Experimental Marine Biology, Institute of Oceanology, Chinese Academy of Sciences, Qingdao 266071, China.

<sup>2</sup>Laboratory for Marine Biology and Biotechnology, Qingdao National Laboratory for Marine Science and Technology, Qingdao 266237, China.

<sup>3</sup>Center for Ocean Mega-Science, Chinese Academy of Sciences, Qingdao 266071, China.

<sup>4</sup>The Key Laboratory of Molecular Microbiology and Technology, Ministry of Education, Tianjin 300071, P. R. China.

<sup>5</sup>TEDA Institute of Biological Sciences and Biotechnology, Nankai University, TEDA, Tianjin 300457, P. R. China.

<sup>6</sup> Tianjin Biochip Corporation, Tianjin 300457, China.

<sup>7</sup>Key Laboratory for Sustainable Utilization of Marine Fisheries Resources of Ministry of Agriculture, Yellow Sea Fisheries Research Institute, Chinese Academy of Fishery Sciences, Qingdao 266071, China.

<sup>8</sup>BGI-Qingdao, BGI-Shenzhen, Qingdao 266071, China.

## Supplementary Figures

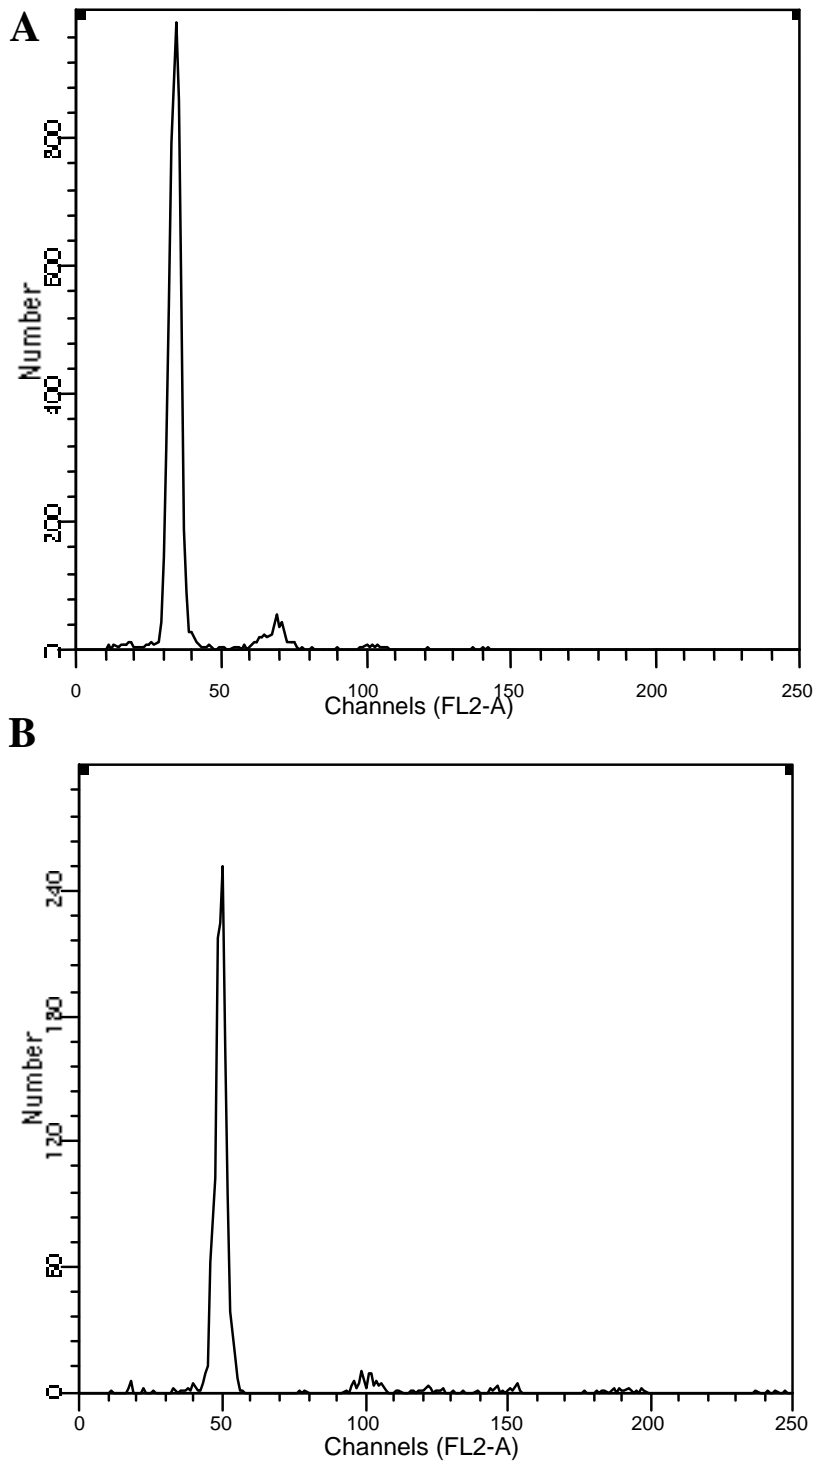

**Supplementary Figure 1. Flow cytometry histogram for measuring the genome size of *F. chinensis*.**

Based on the flow cytometry result, the genome size of *F. chinensis* (A) was estimated to be approximately  $69.66 \pm 3.82\%$  of the mouse genome (B) (genome size of  $\sim 2.50$  Gb). Thus, the *F. chinensis* genome size identified as 1.74 Gb.

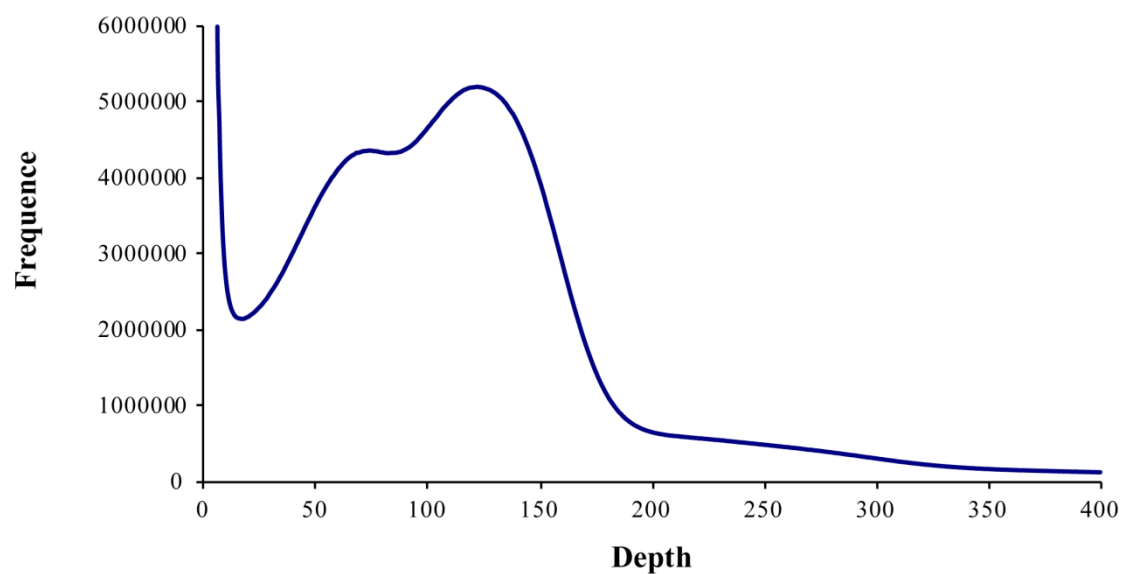

**Supplementary Figure 2. K-mer distribution of the *F. chinensis* genome sequences.**

K-mer analysis estimated the genome size of *F. chinensis* to be 1.88 Gb.

*F. chinensis*

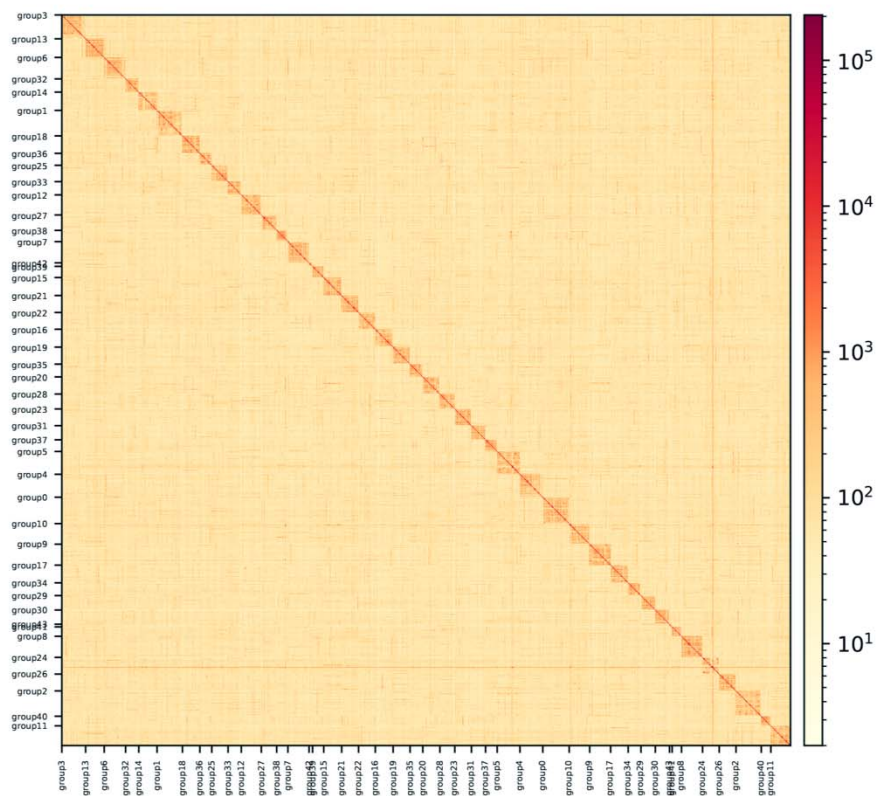

*L. vannamei*

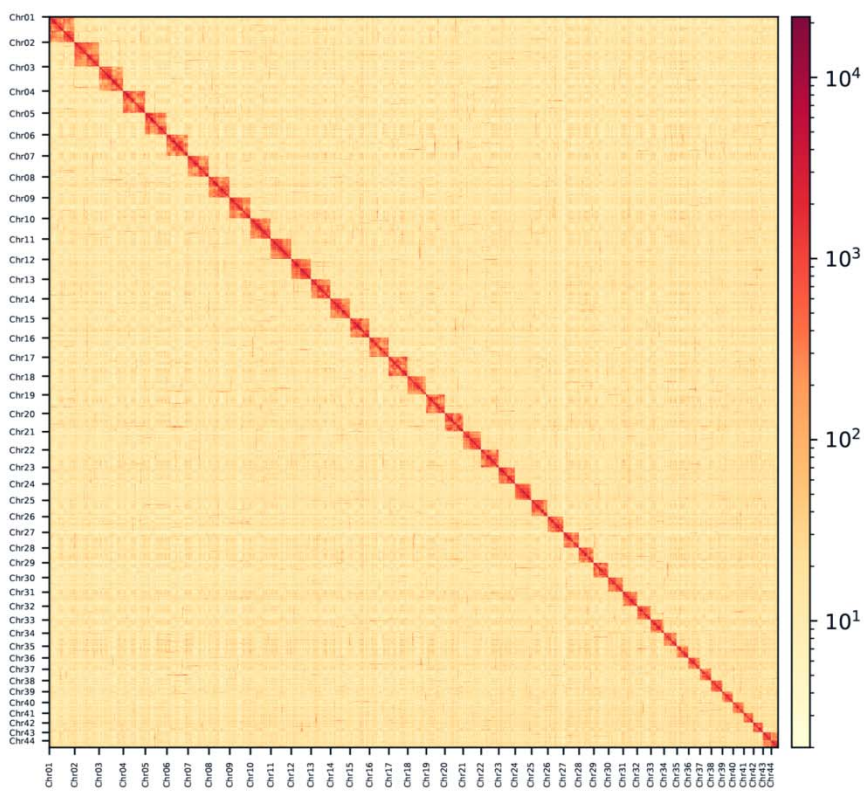

**Supplementary Figure 3. Heat map of the Hi-C assembly.**

The colour bar illuminates the contact density from white (low) to red (high).

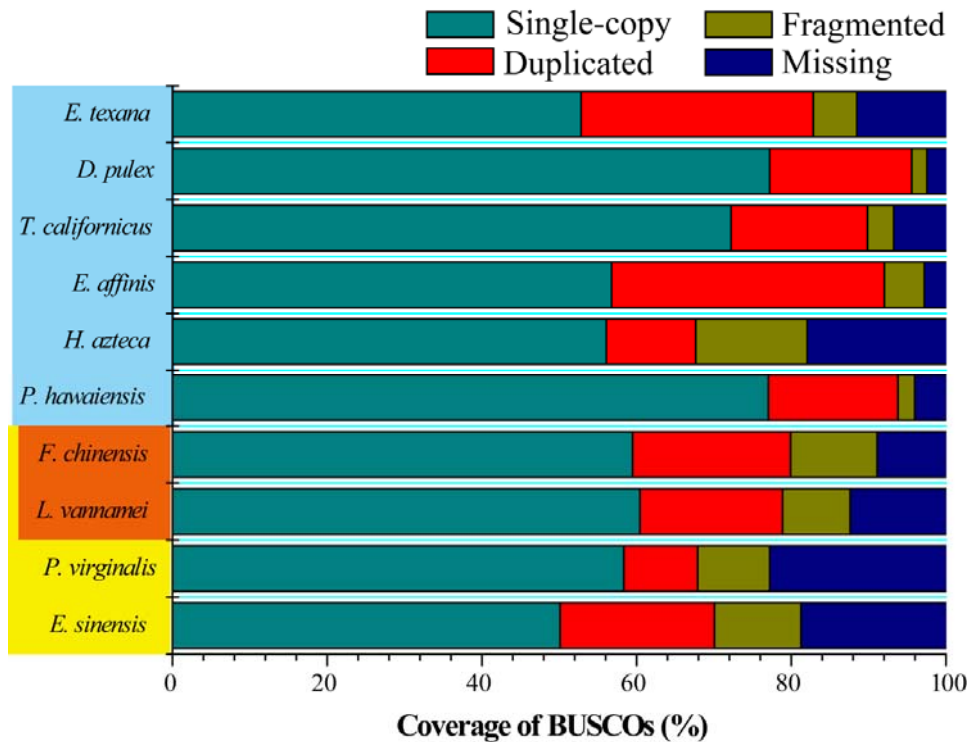

**Supplementary Figure 4. The core gene coverage of crustacean genomes.**  
The database used for BUSCO assessment was 1066 BUSCOs of Arthropoda.

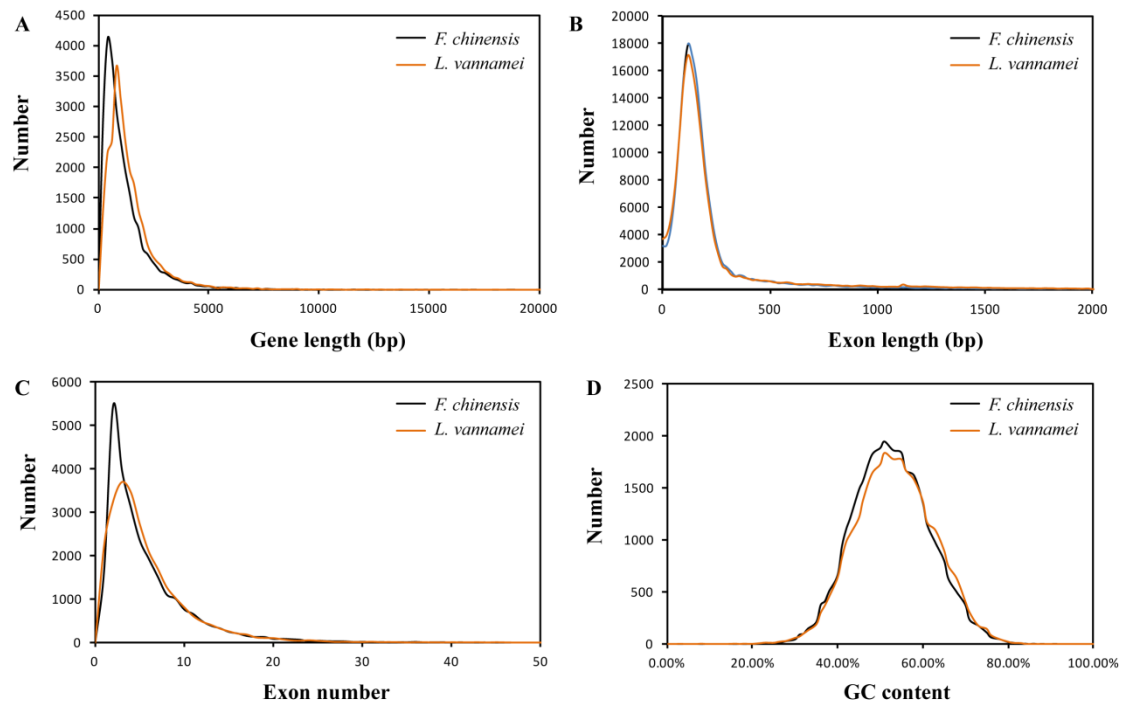

**Supplementary Figure 5. Gene structure comparison between the two penaeid shrimp species.**

Four gene features, including gene length, exon length, exon number, and GC content of genes, were compared between *F. chinensis* and *L. vannamei*. *F. chinensis* showed similar distribution of gene features with *L. vannamei*.

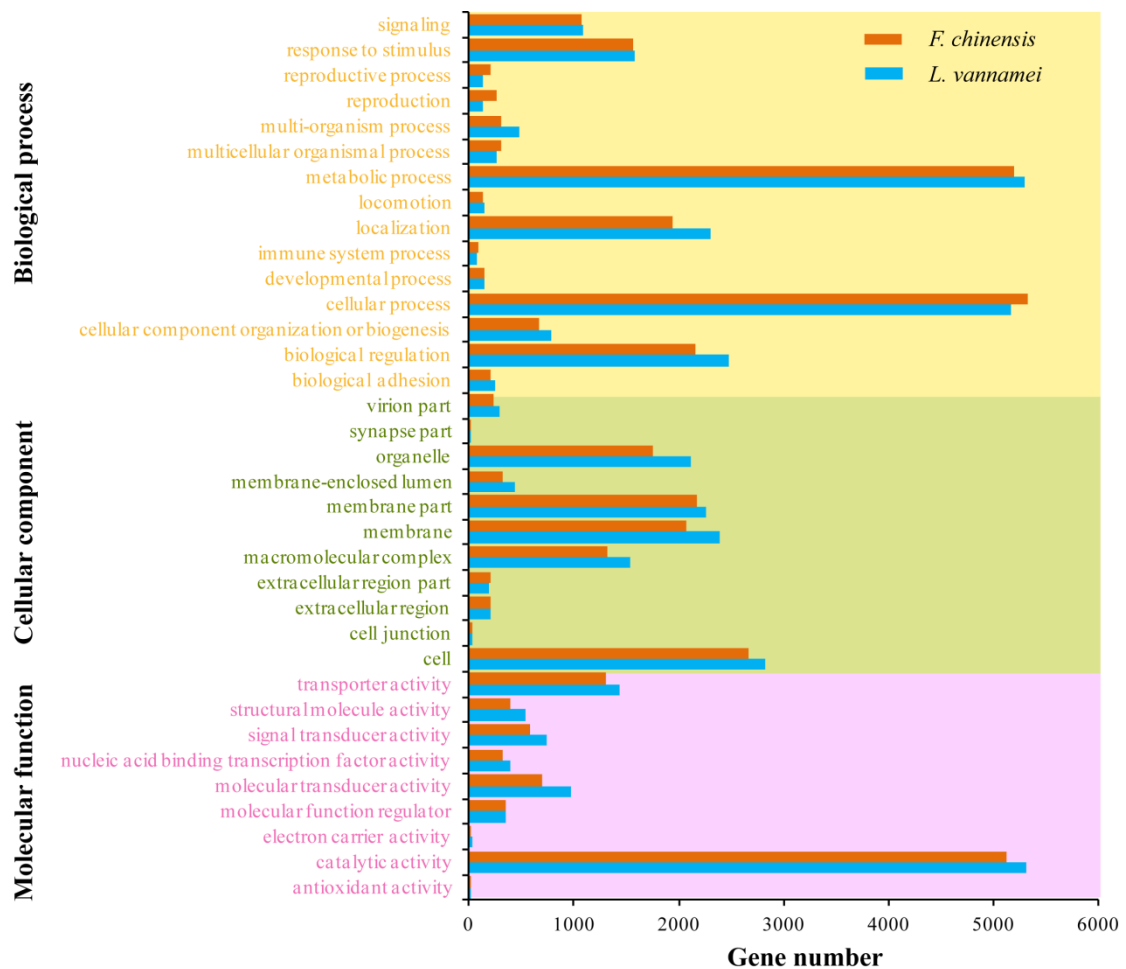

**Supplementary Figure 6. Gene ontology (GO) classification of genes of the two penaeid shrimp species.**

*F. chinensis* showed similar distribution of GO classification with *L. vannamei*. The genes of the two penaeid shrimp species were majorly distributed in GO terms of response to stimulus, metabolic process, cellular process, organelle, membrane, cell, and catalytic activity.

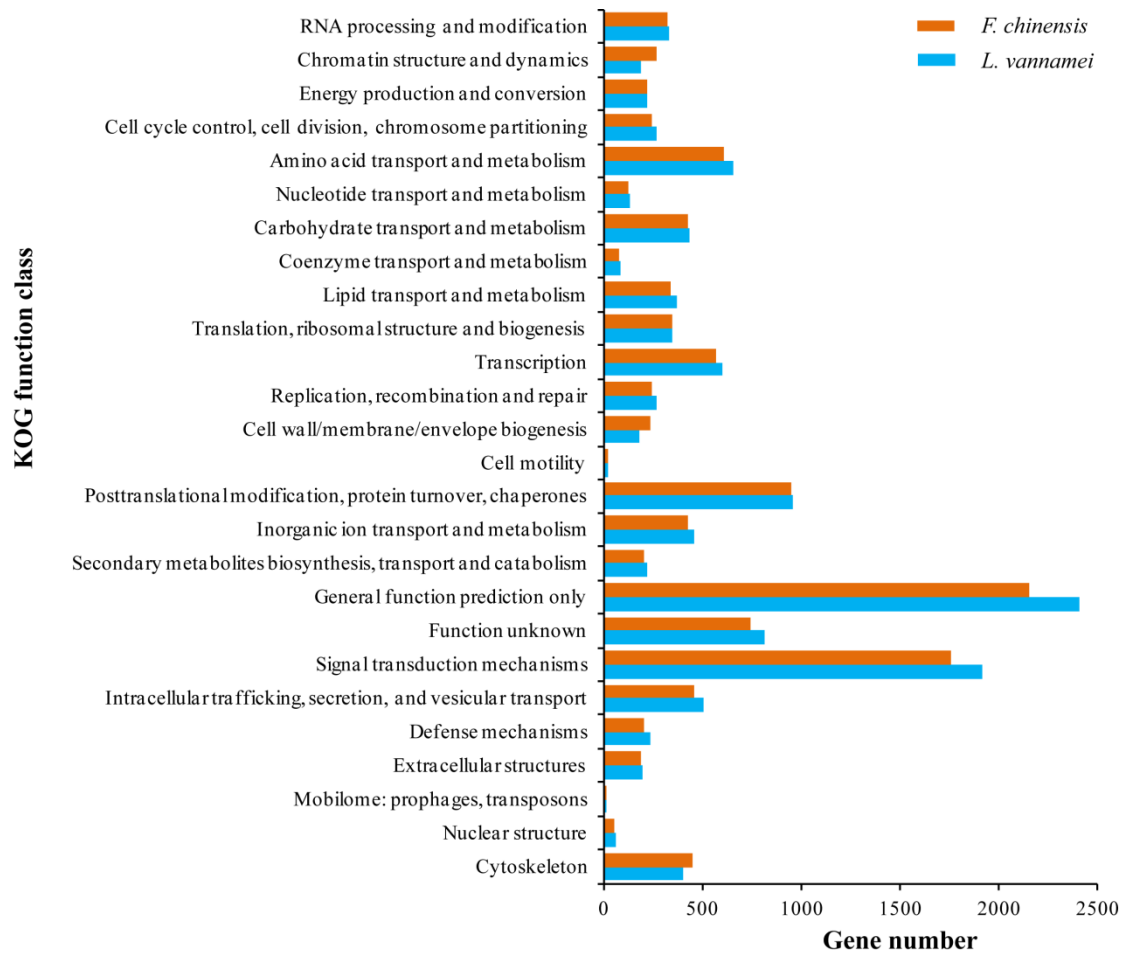

**Supplementary Figure 7. KOG classification of genes of the two penaeid shrimp species.**

*F. chinensis* showed similar distribution of KOG classification with *L. vannamei*. The genes of the two penaeid shrimp species were majorly distribute in KOG terms of cytoskeleton, signal transduction mechanisms, posttranslational modification, transcription, amino acid transport and metabolism.

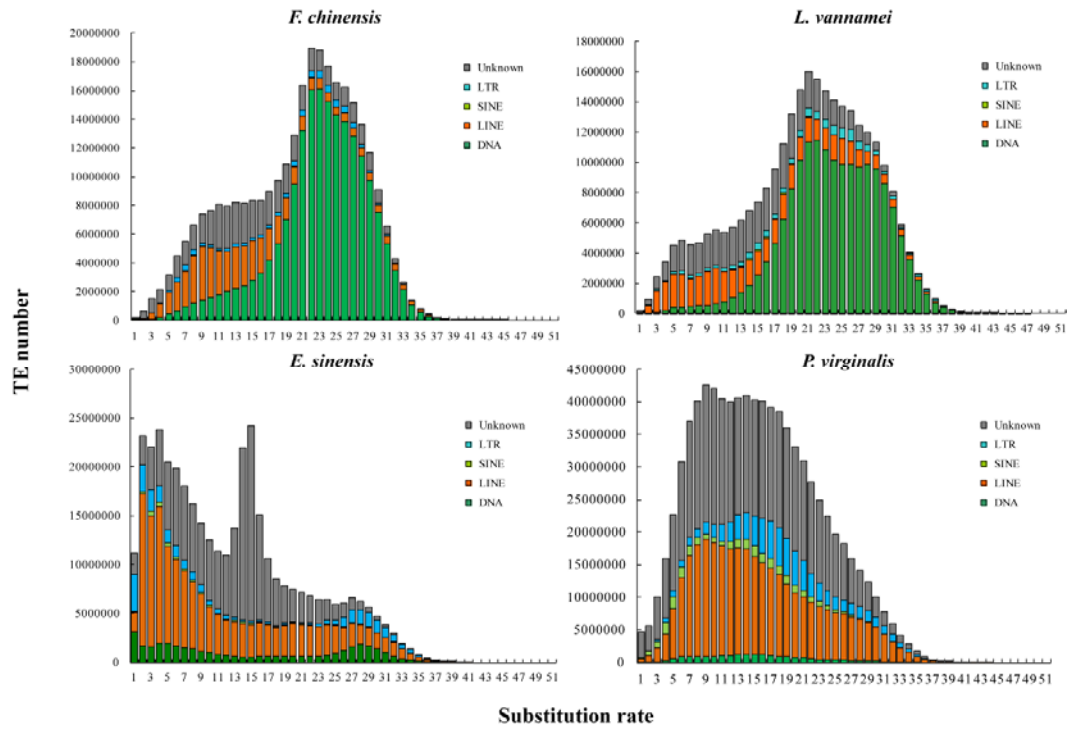

**Supplementary Figure 8. Substitution rate distribution of repeats in the four decapod genomes.**

The substitution rates were calculated between the genomic and repeat consensus sequences. The distribution of transposable elements of the two penaeid shrimp species was similar in comparison with the other two decapod species (*E. sinensis* and *P. virginalis*).

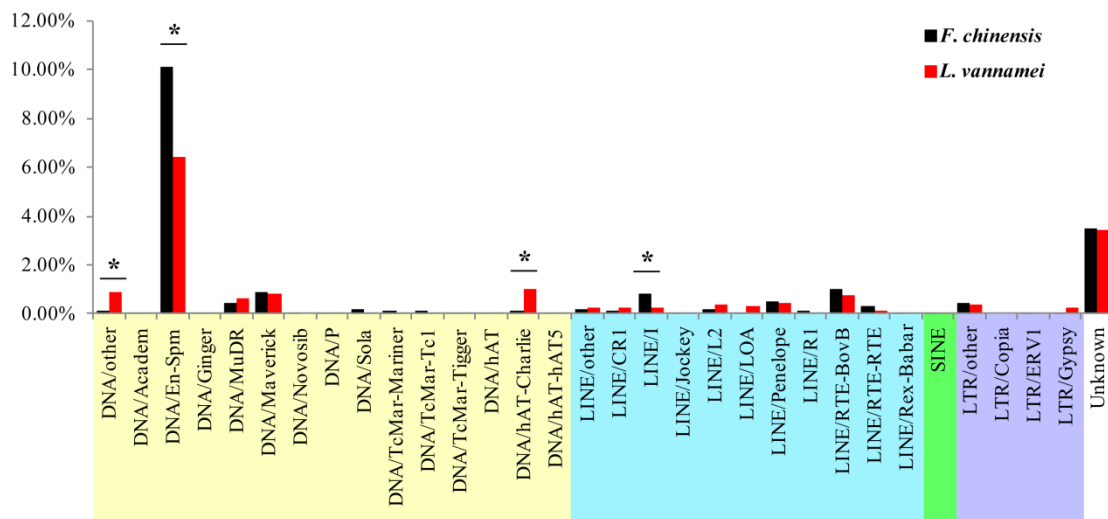

**Supplementary Figure 9. Comparison of repetitive sequences between the two penaeid shrimp genomes.**

The composition of transposable elements of two penaeid shrimp species was similar. However, *F. chinensis* contains more DNA transposons of En-Spm and LINE/I ( $p < 0.05$ ). *L. vannamei* contains more DNA transposons of hAT-Charlie.



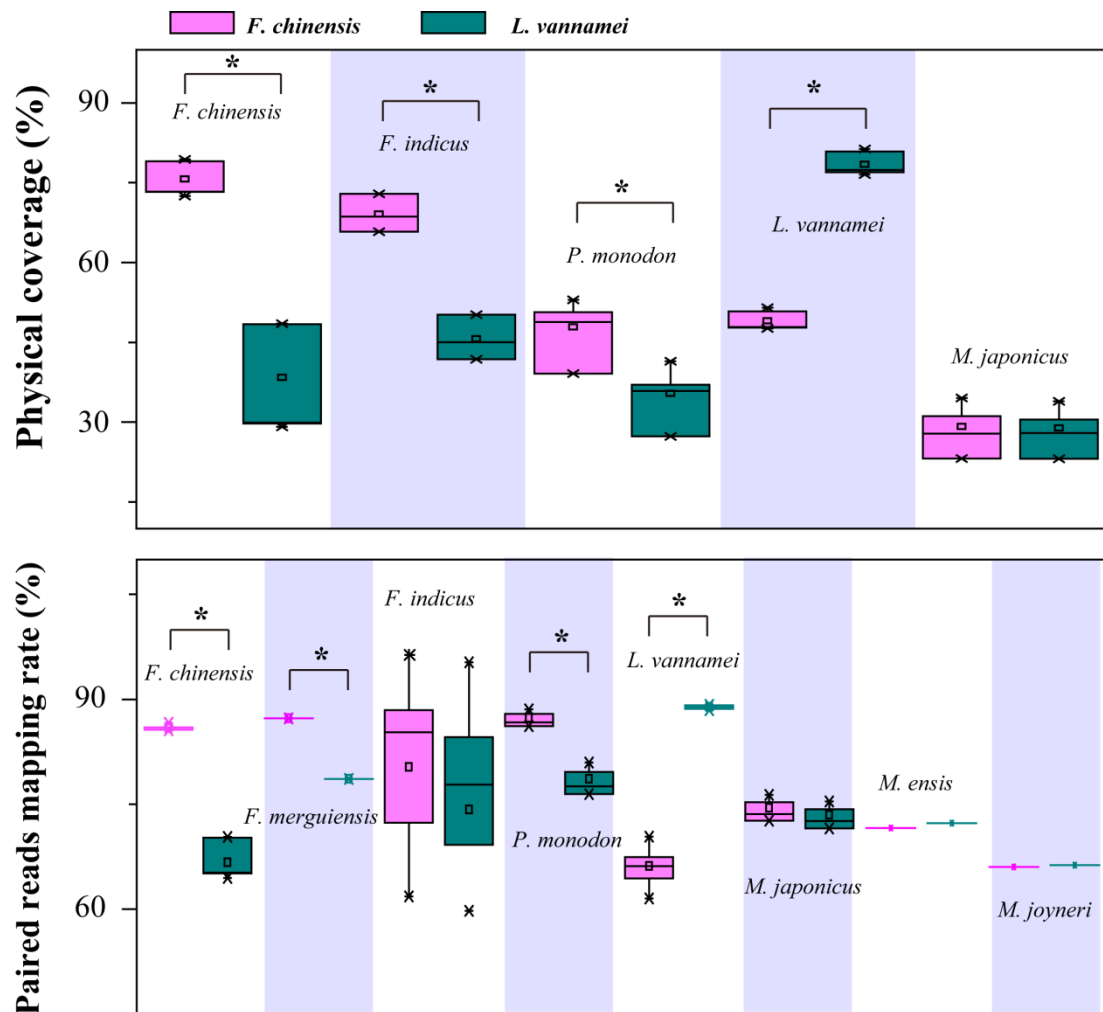

**Supplementary Figure 10. Physical coverage and paired reads mapping rate of the Illumina sequencing data on the two penaeid shrimp genomes.**

The genome data of the penaeid shrimp species were downloaded from NCBI SRA database (Supplementary materials Table S14). The paired-end Illumina sequencing reads were mapped against the *F. chinensis* and *L. vannamei* genomes, respectively. The physical coverage of the genome and the paired reads mapping rates were calculated. As the sequencing data of *F. indicus*, *M. ensis*, and *M. joyneri* were too scarce to cover the genome, the physical coverage of these three species did not calculated. \* indicates significant difference with  $p < 0.05$ .

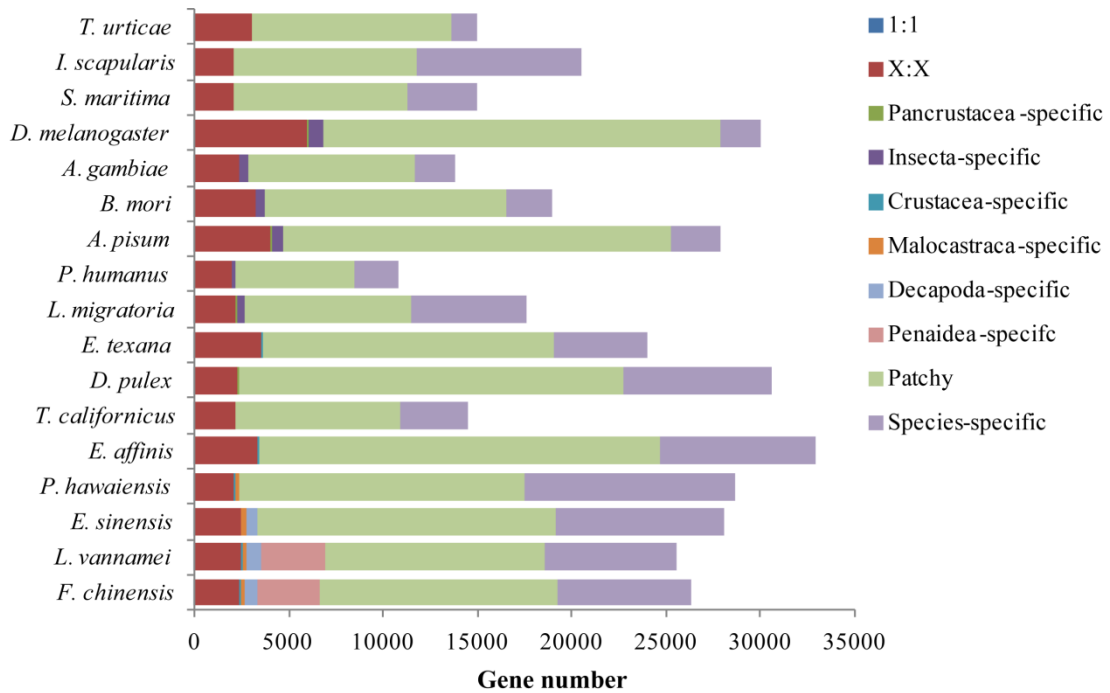

**Supplementary Figure 11. Comparison of the gene repertoire of 17 arthropod genomes.**

“1:1” indicates single-copy genes, “X:X” indicates orthologous genes present in multiple copies in all the ten species, where X means one or more orthologs per species, “patchy” indicates the existence of other orthologs that are presented in at least one genome.

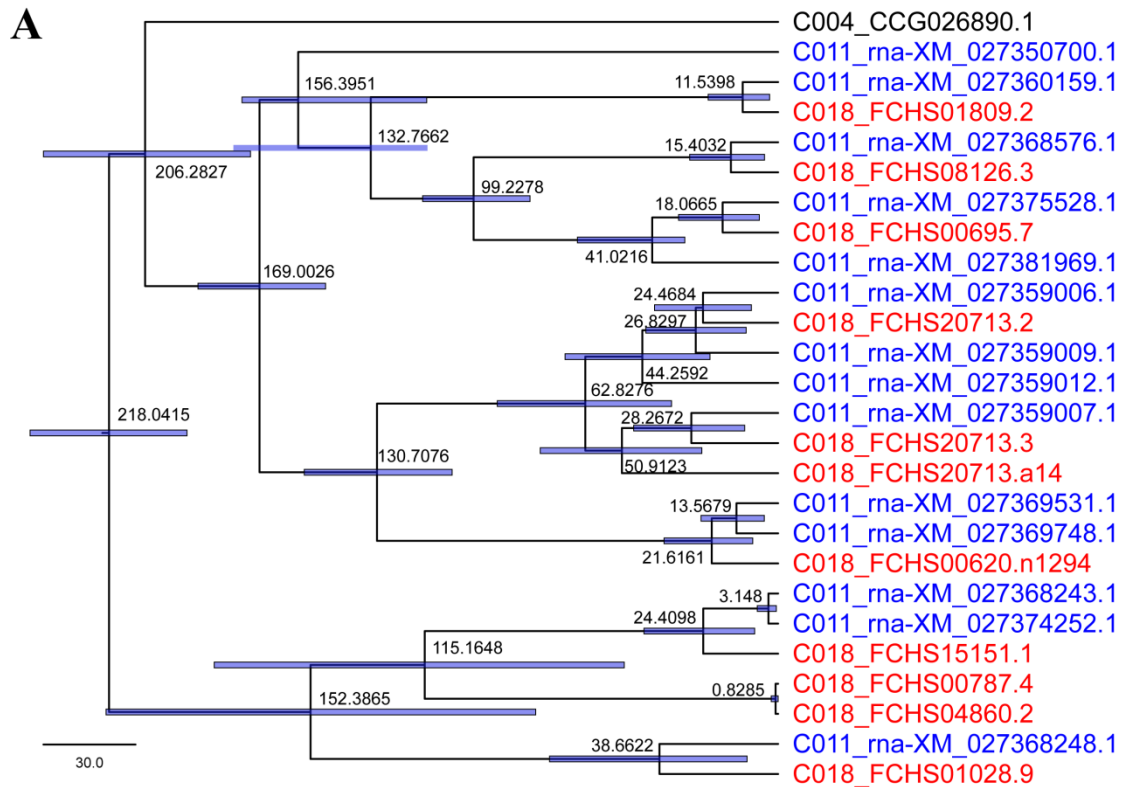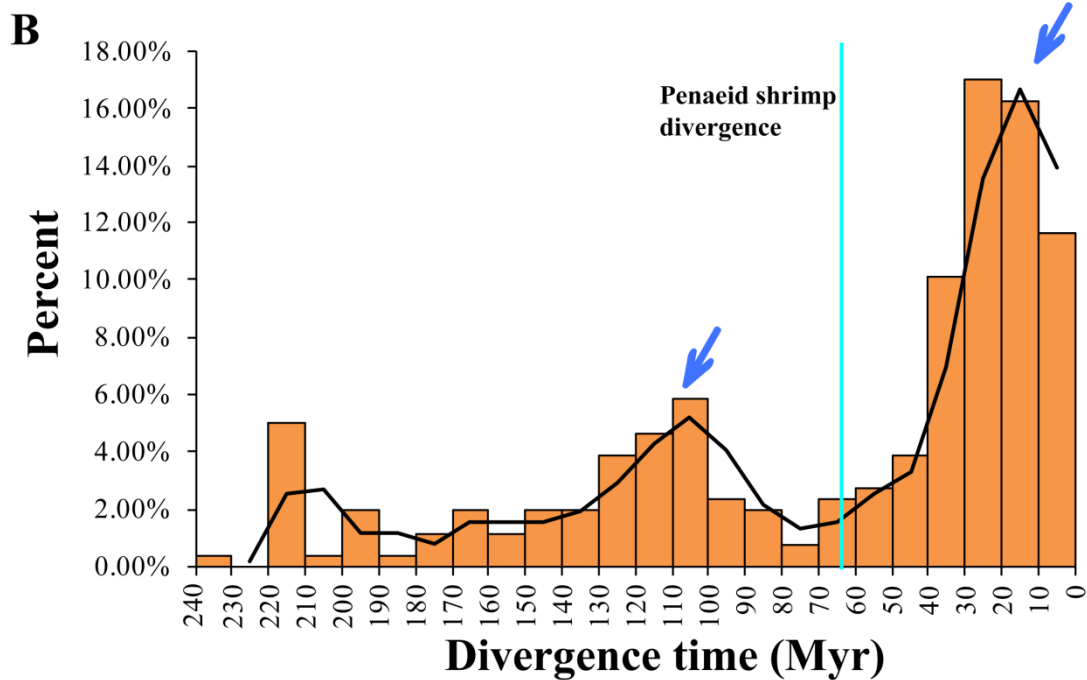

**Supplementary Figure 12. The divergence times of the expanded gene families.**

(A) Phylogenetic tree of a expanded gene family (cytochrome P450 family 2 subfamily J) in *F. chinensis* (C018) and *L. vannamei* (C011). The numbers on the branches indicate the estimated divergence times (MYA). Error bars indicate 95% confidence levels. (B) The divergence time distribution of the expanded gene families. These genes were expanded two times (0-50 Myr and 80-160 Myr) that before and after the divergence of penaeid shrimp, respectively.

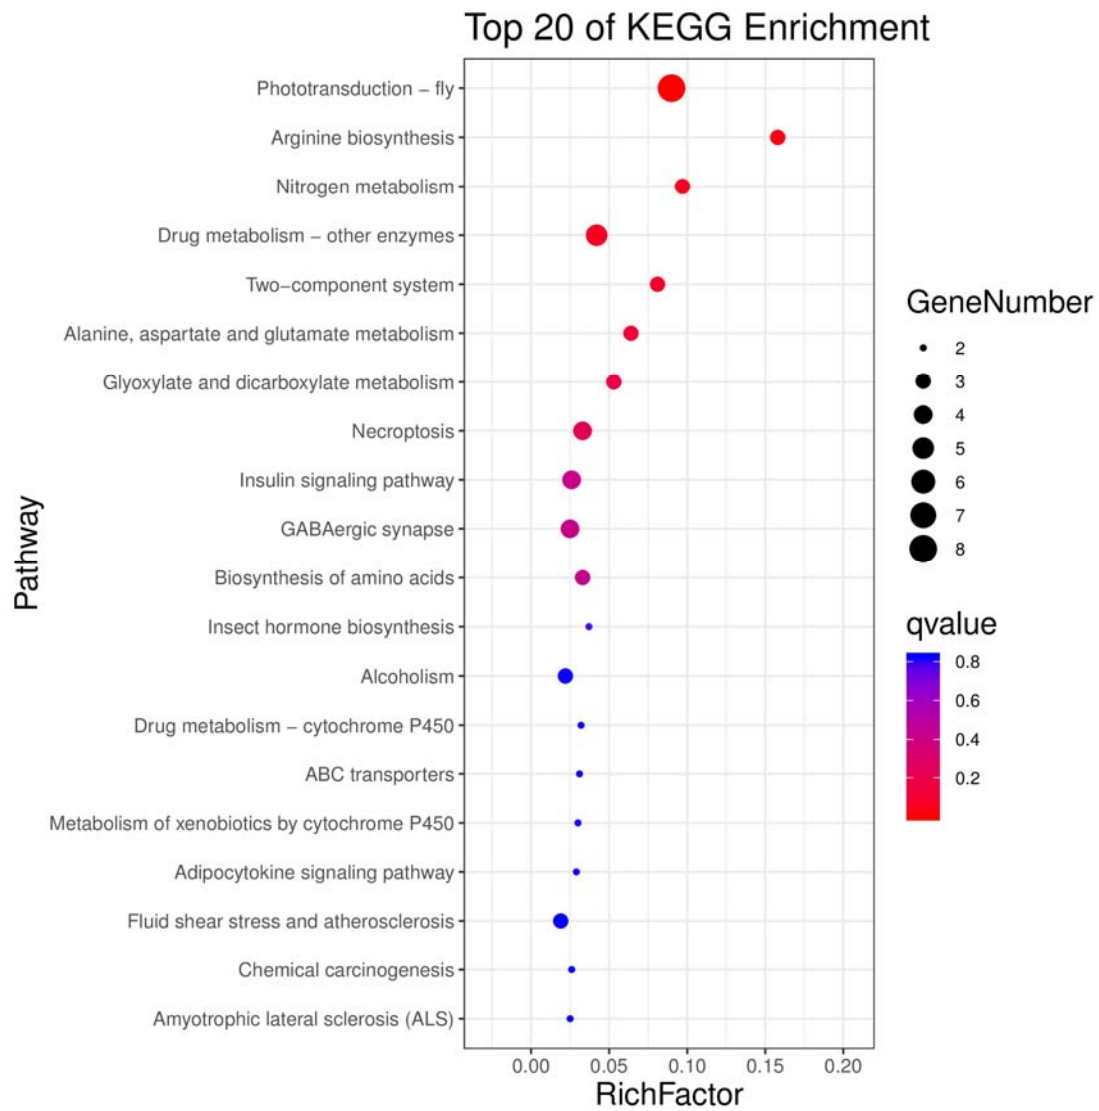

**Supplementary Figure 13. KEGG enrichment analysis of the positively selected genes in penaeid shrimp.**

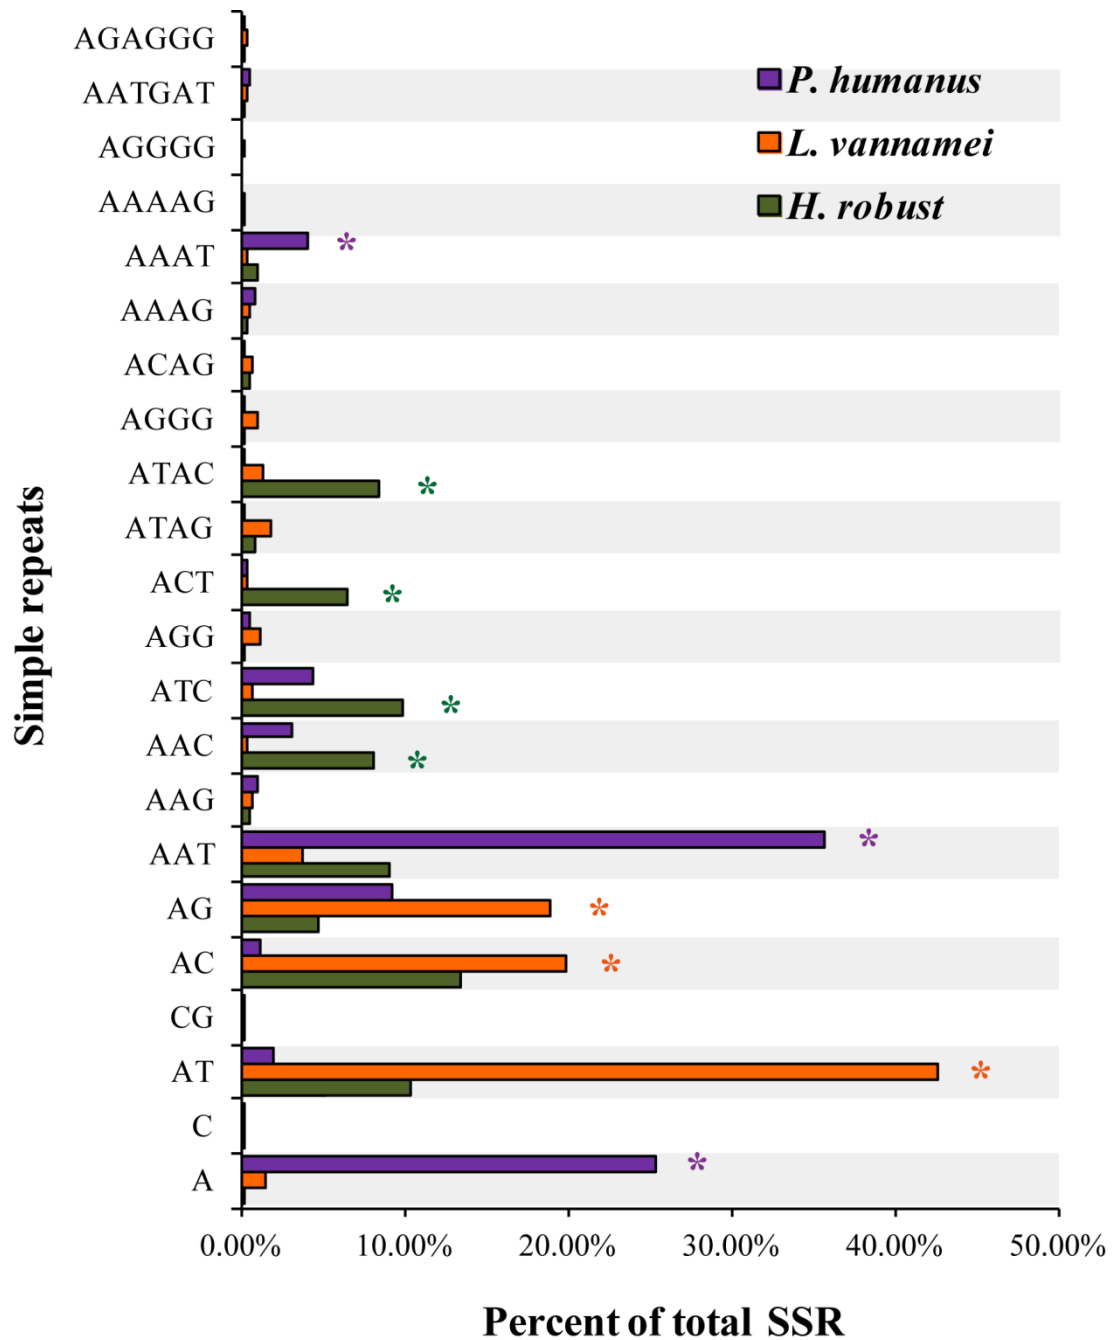

**Supplementary Figure 14. Comparison of the SSR composition of SSR-rich genomes.**

The penaeid shrimp harbored many more dinucleotide SSRs ((AT)<sub>n</sub>, (AC)<sub>n</sub>, (AG)<sub>n</sub>), while *P. humanus* had more A-rich SSRs ((A)<sub>n</sub>, (AAT)<sub>n</sub>, (AAAT)<sub>n</sub>), and *H. robusta* had more triplet and tetranucleotide SSRs ((ATAC)<sub>n</sub>, (ATC)<sub>n</sub>, (ATC)<sub>n</sub>, and (AAC)<sub>n</sub>) (p < 0.05).

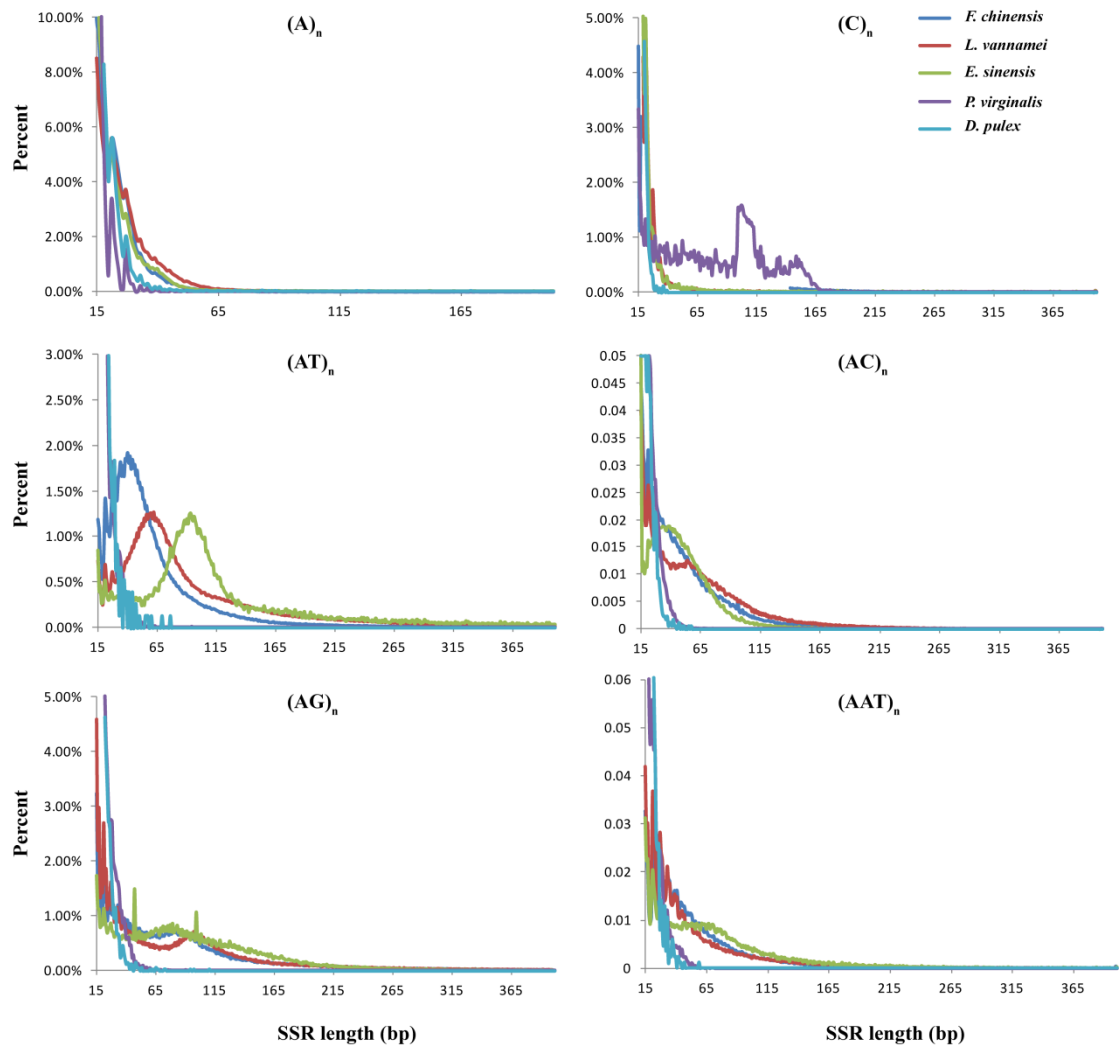

**Supplementary Figure 15. SSR length distribution of the five crustacean genomes.**

A peak of long SSRs could be observed along the (AT)<sub>n</sub>, (AC)<sub>n</sub>, and (AG)<sub>n</sub> SSRs distribution of the two penaeid shrimp species, but not present in other types of SSRs.

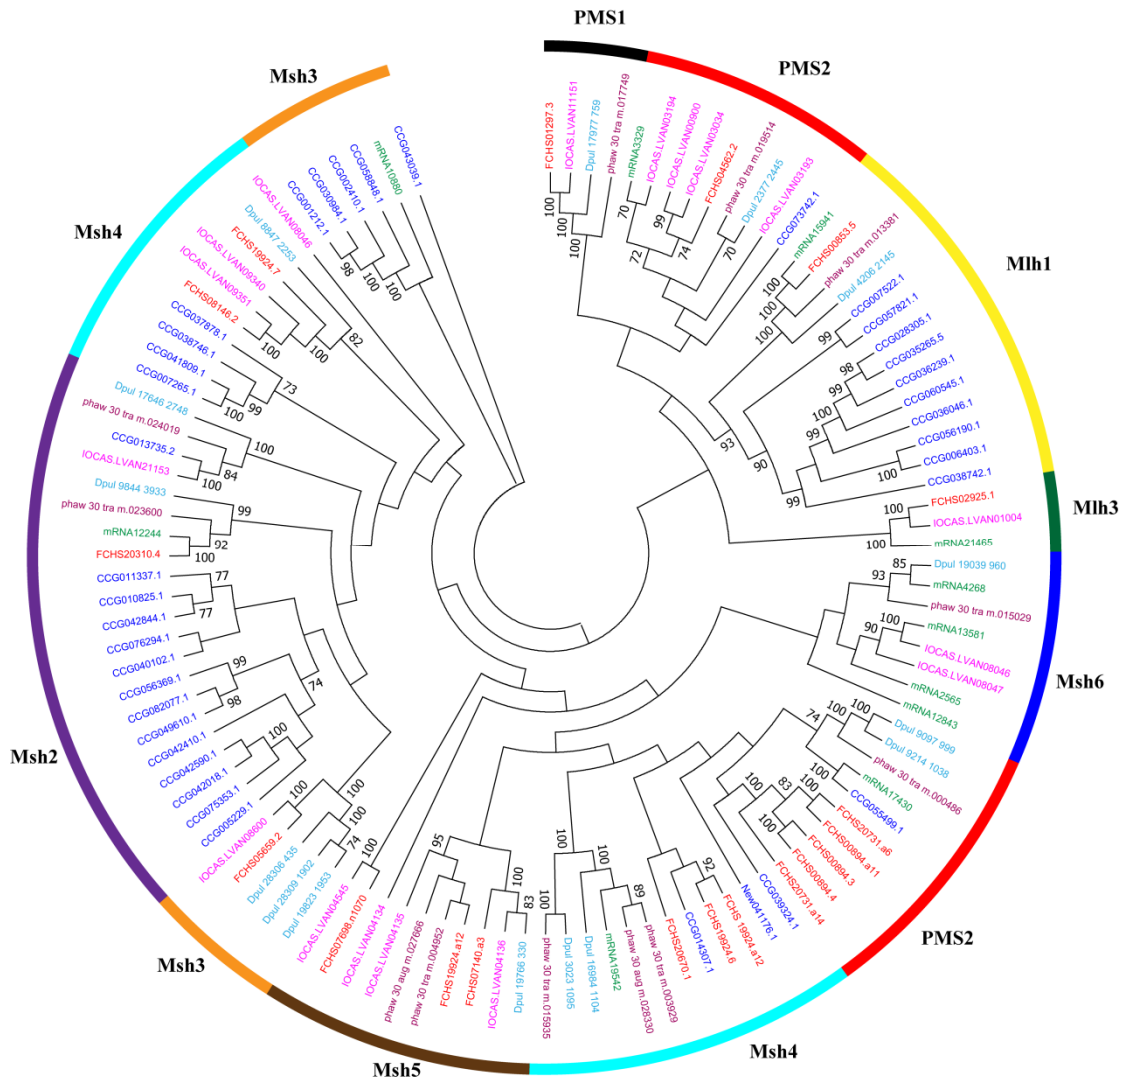

**Supplementary Figure 16. Phylogenetic tree of the MMR gene family.**

The phylogenetic tree was constructed by using ML methods with the substitute model of JTT+G, and 1000 bootstraps were performed. Various MMR genes were clustered together, and penaeid shrimp genomes contained most of them.

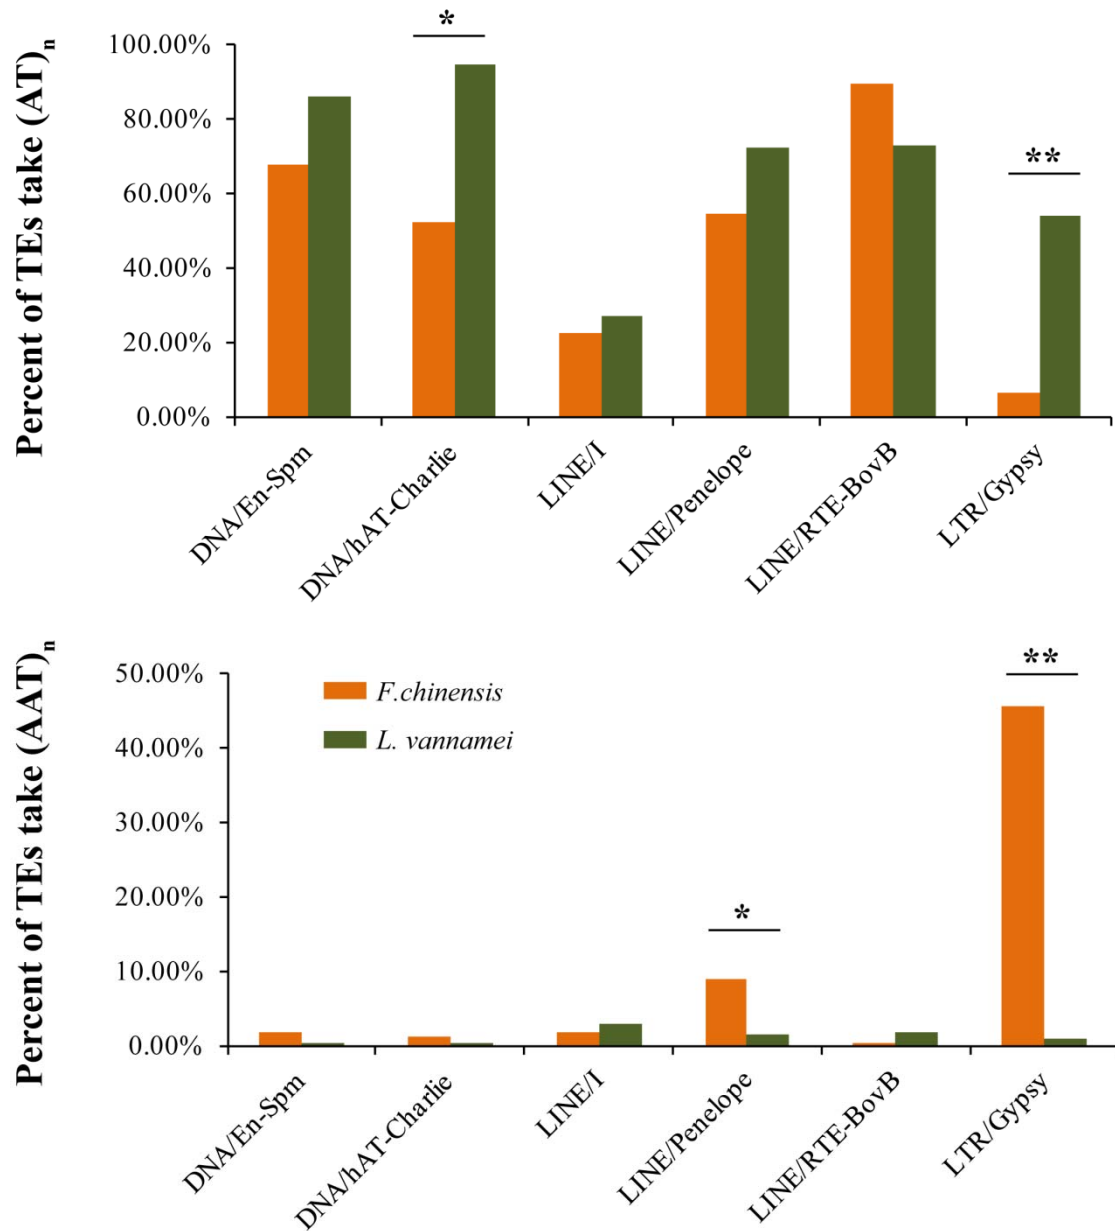

**Supplementary Figure 17. Comparison of TEs harbor (AT)<sub>n</sub> and (AAT)<sub>n</sub> SSRs in the two shrimp genomes.**

The percent of TEs harboring (AT)<sub>n</sub> and (AAT)<sub>n</sub> SSRs showed some differences (hAT-Charlie, Penelope and Gypsy) in two penaeid shrimp genomes. \* indicates  $p < 0.05$  and \*\* indicates  $p < 0.01$ . However, these TEs did not specifically harbor (AT)<sub>n</sub> and (AAT)<sub>n</sub> except Gypsy. Gypsy specifically harbor (AT)<sub>n</sub> in *L. vannamei*, while it harbor (AAT)<sub>n</sub> in *F. chinensis* specifically. Whereas hAT-Charlie and Penelope majorly contained (AT)<sub>n</sub> in both shrimp genomes.



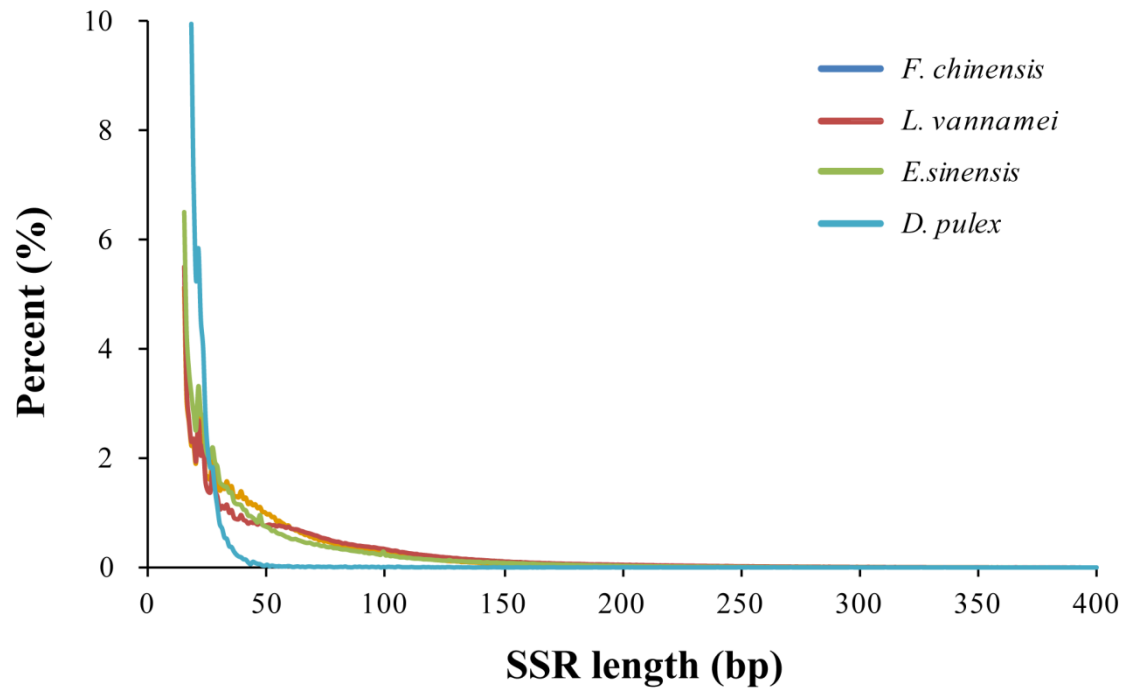

**Supplementary Figure 18. SSR length distribution of four crustacean genomes.**

The SSRs were mostly short SSRs with the length short than 25 bp. No peak could be observed around the length of 60 bp (long SSRs).

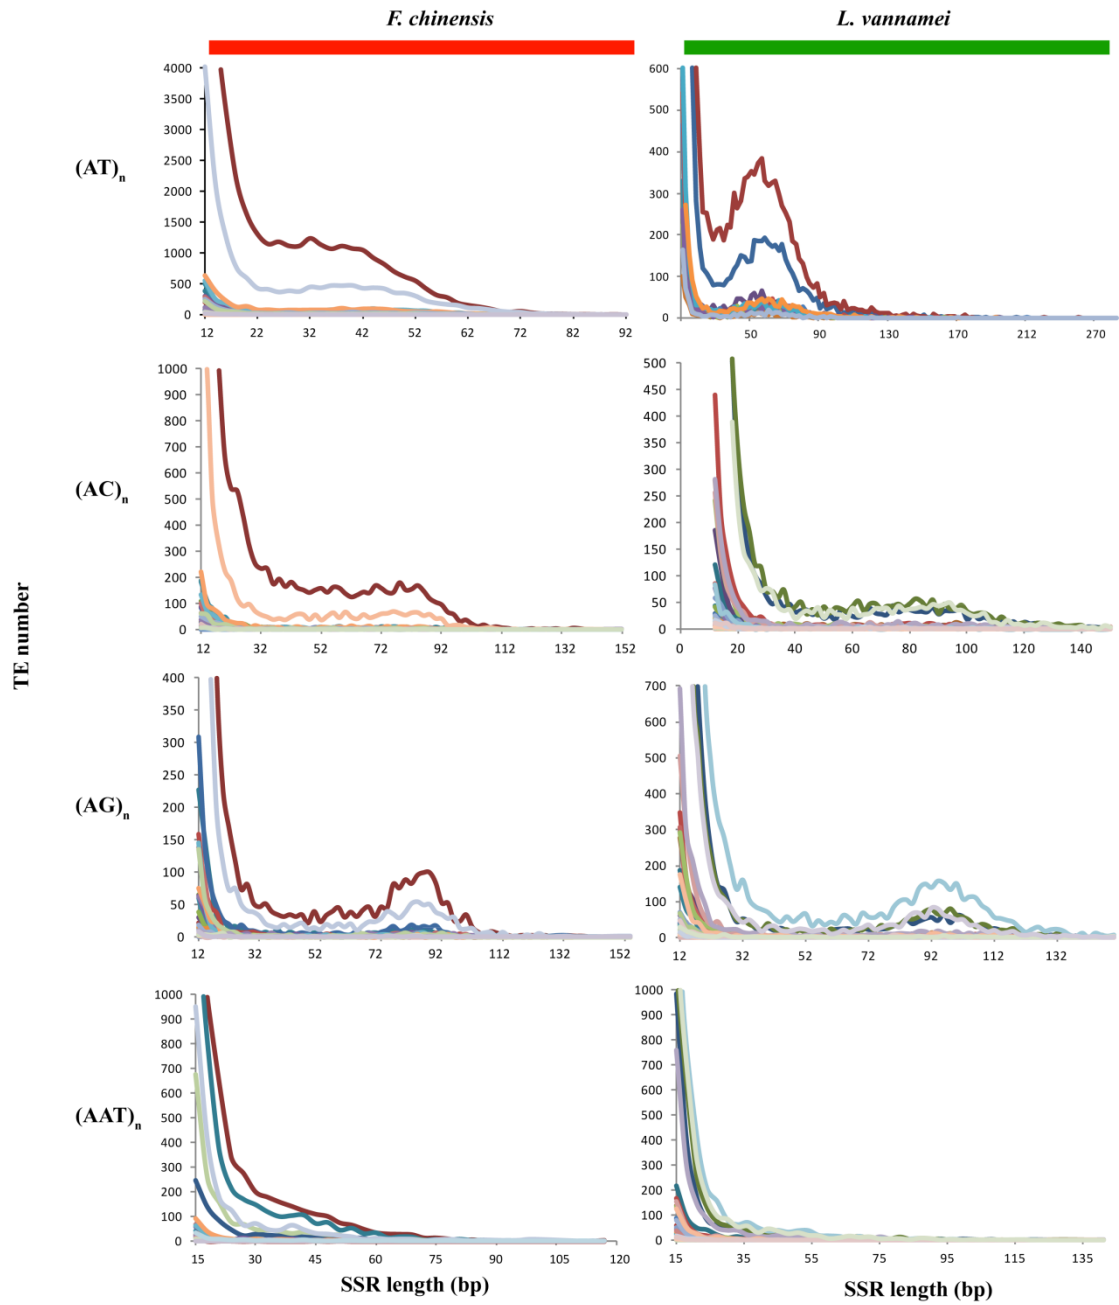

**Supplementary Figure 19. The distribution of TE numbers that harboring various lengths of SSRs.**

The curve with different colour indicates different TEs that harboring SSRs. Except for (AAT)<sub>n</sub> SSRs, a peak of long SSRs could be observed along the (AT)<sub>n</sub>, (AC)<sub>n</sub>, and (AG)<sub>n</sub> SSRs distribution in the two penaeid shrimp genomes.

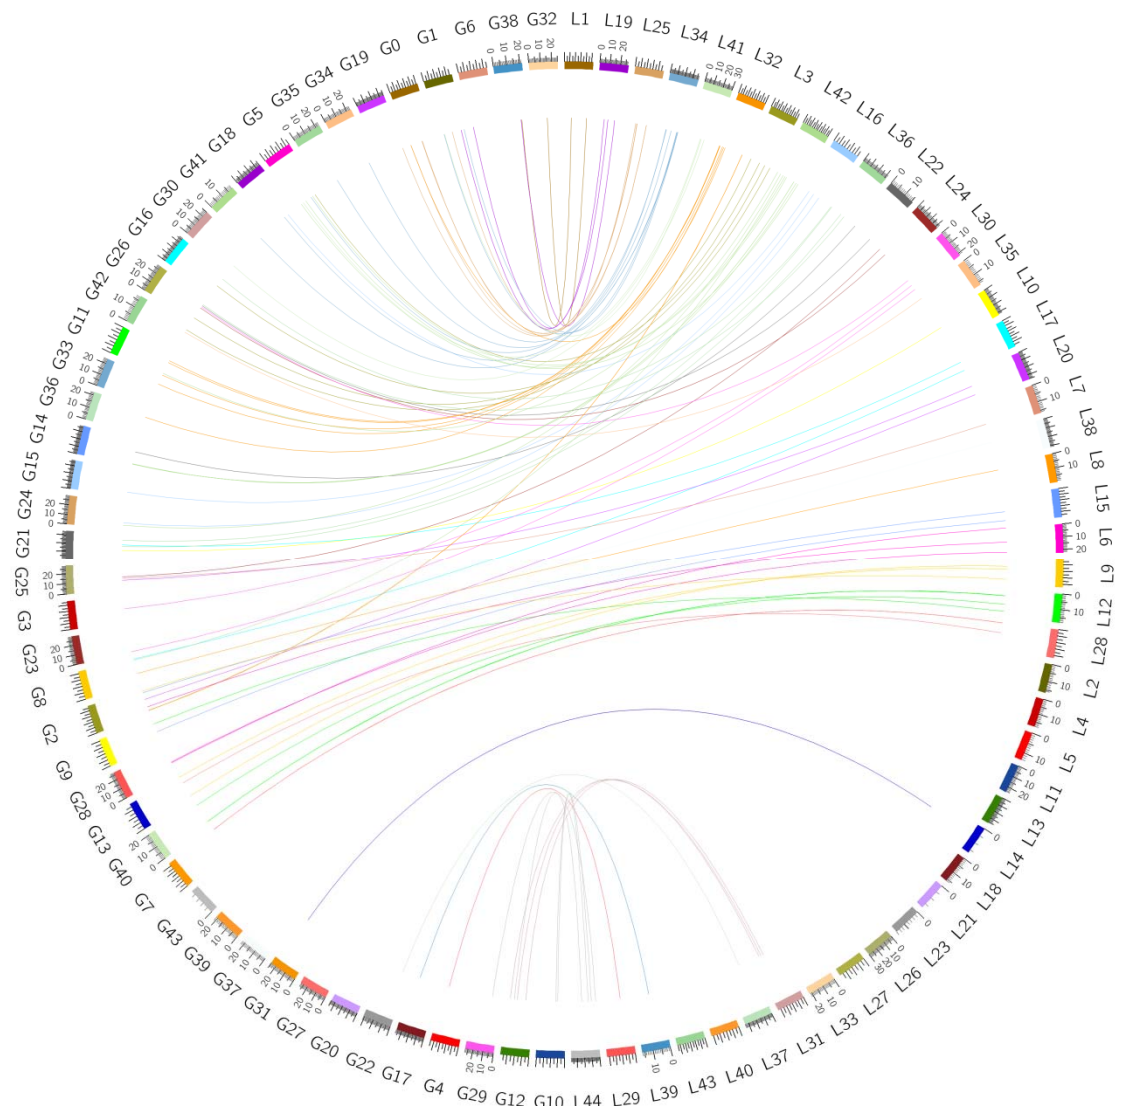

**Supplementary Figure 20. The synteny of the two penaeid shrimp genomes.**

The synteny of the two shrimp genomes was assessed by MCScanX. Each linking line in the center of the circle indicates a syntenic block that involving at least 5 collinear gene pairs. Only 293 syntenic blocks covering 2149 genes were identified between the two shrimp genomes.

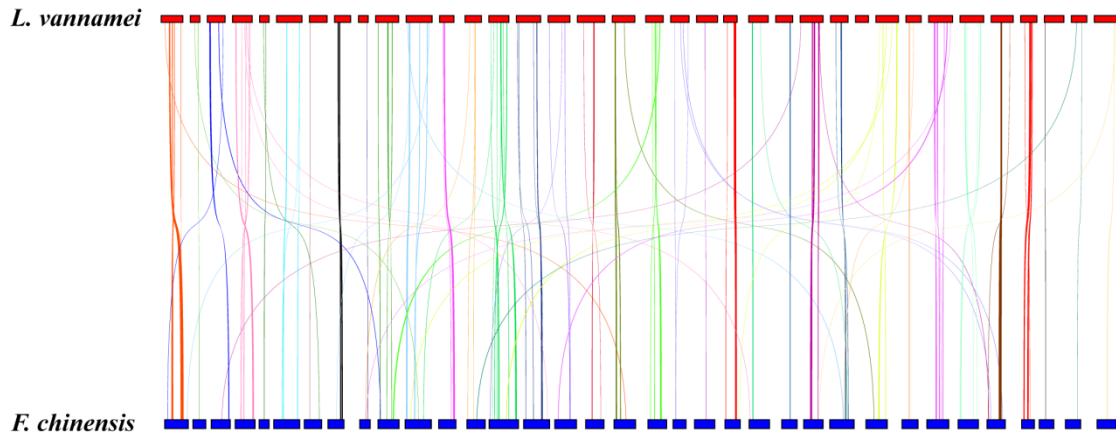

**Supplementary Figure 21. The synteny of the orthologous genes of the two penaeid shrimp genomes.**

Each line linked chromosomes of two shrimp genomes indicate a single orthologous gene. The chromosomes of the two shrimp species showed highly one-on-one synteny. However, the positions of orthologous genes altered their positions intrachromosome.

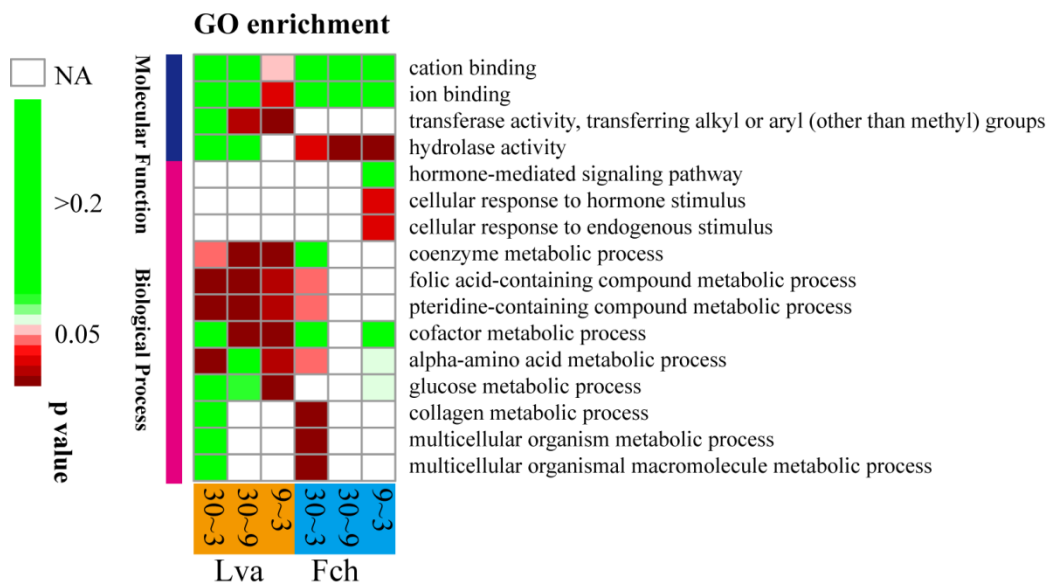

**Supplementary Figure 22. GO enrichment analysis of the differential expressed genes under low-salinity pressure in the two penaeid shrimp species.**

Differential gene expression analysis was performed on the two penaeid shrimp species, *L. vannamei* (Lva) and *F. chinensis* (Fch), and the significance *p* value was calculated for the GO enrichment analysis. NA indicates no DEGs identified in relative GO terms.

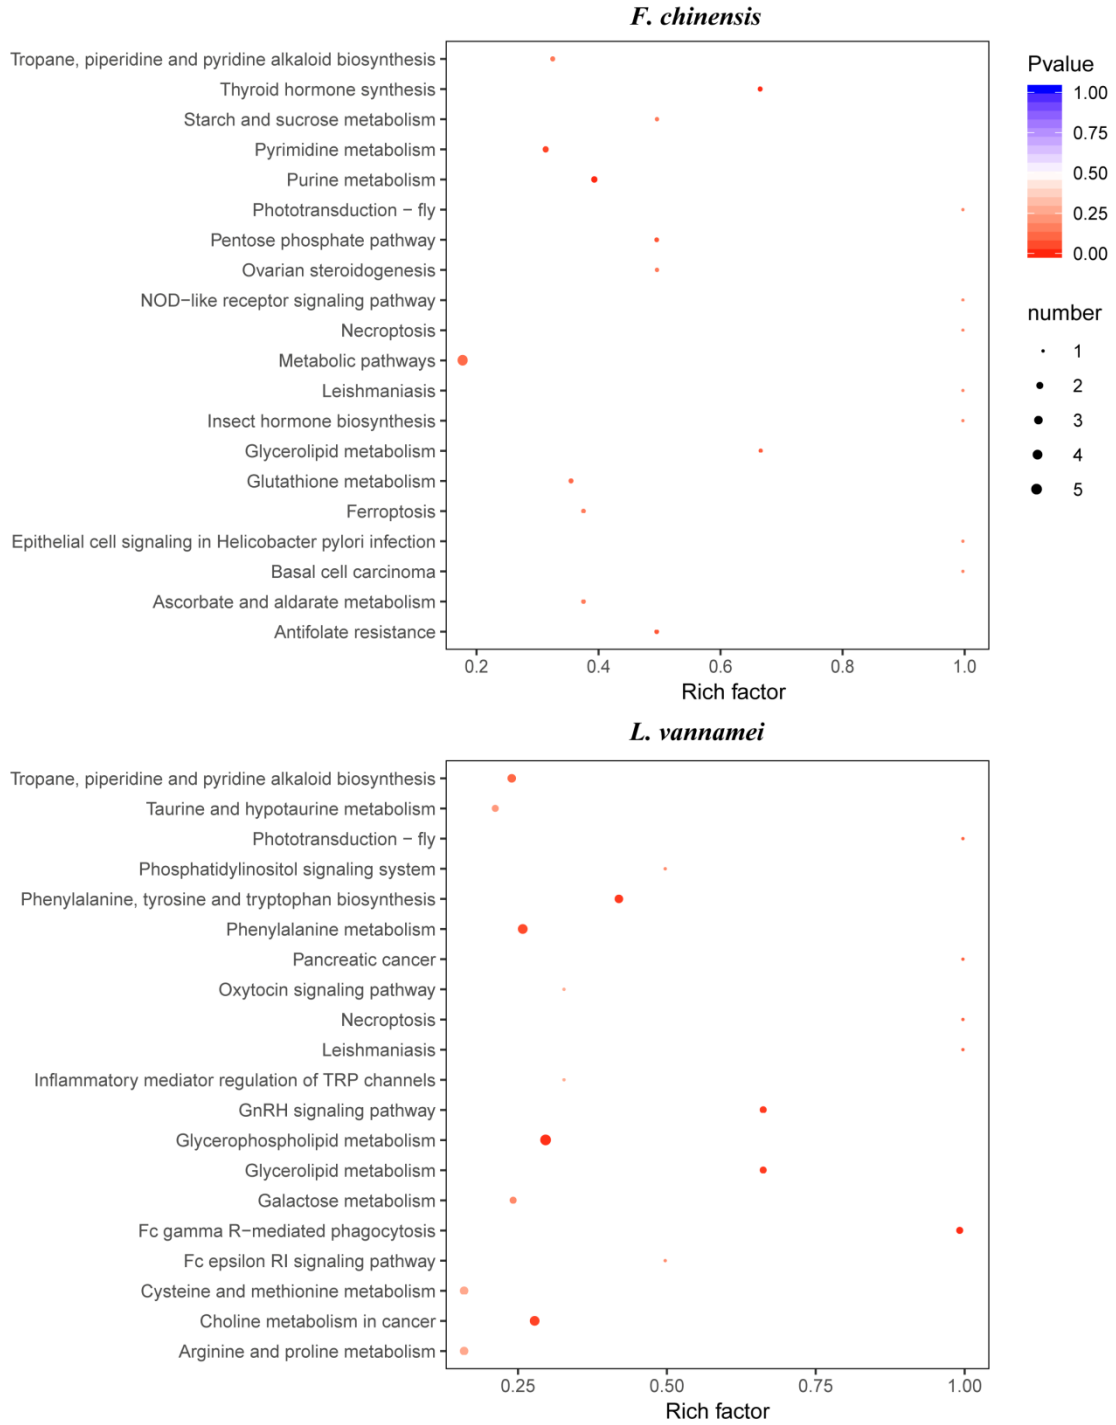

**Supplementary Figure 23. KEGG enrichment analysis of the differential regulated metabolites under low-salinity pressure in penaeid shrimp.**

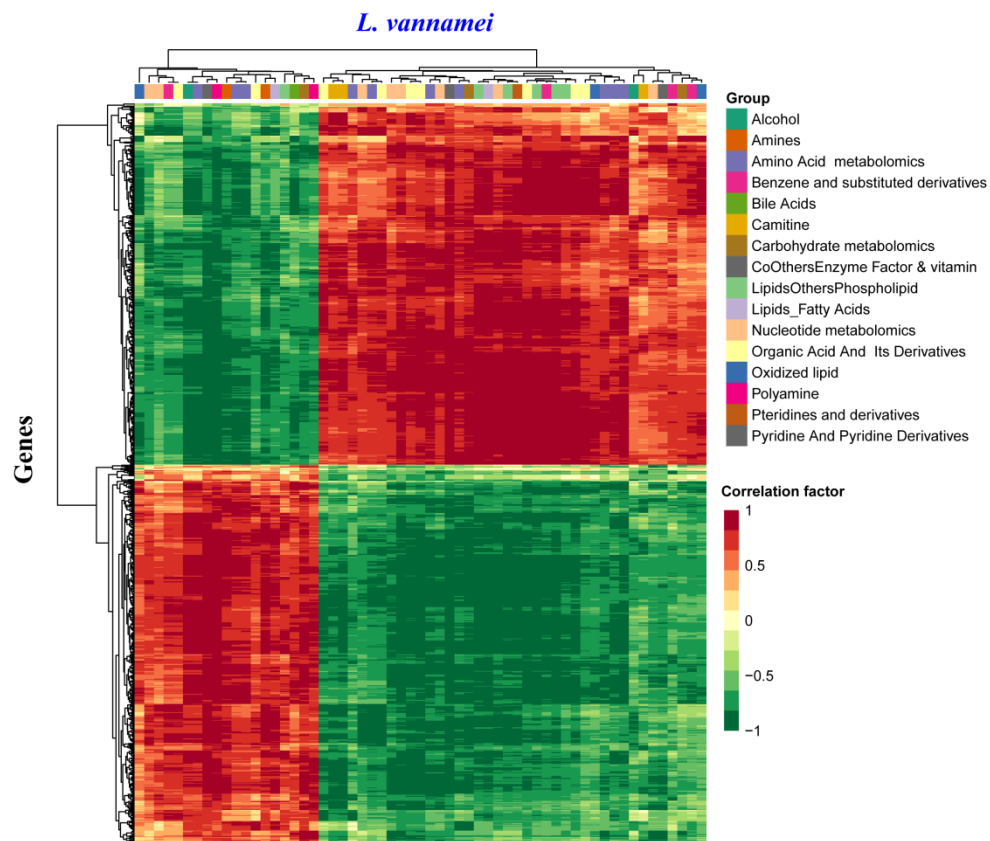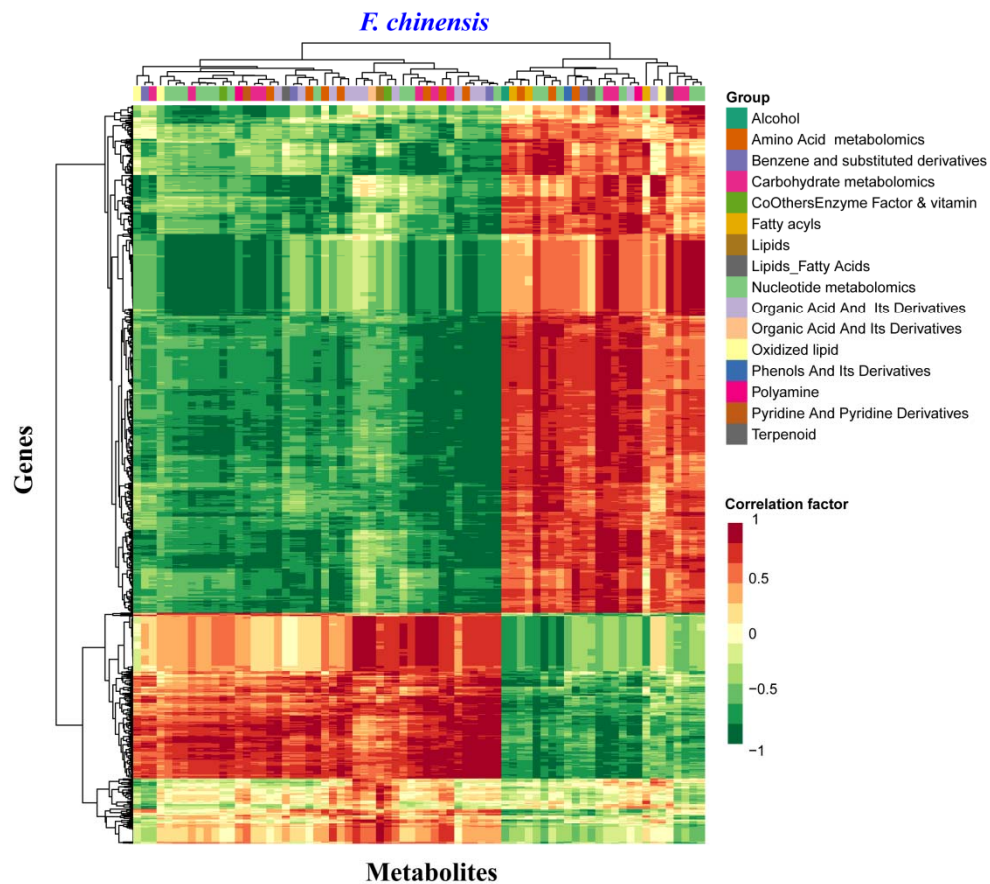

**Supplementary Figure 24. The correlation of the gene expression with the metabolites under low-salinity pressure.**

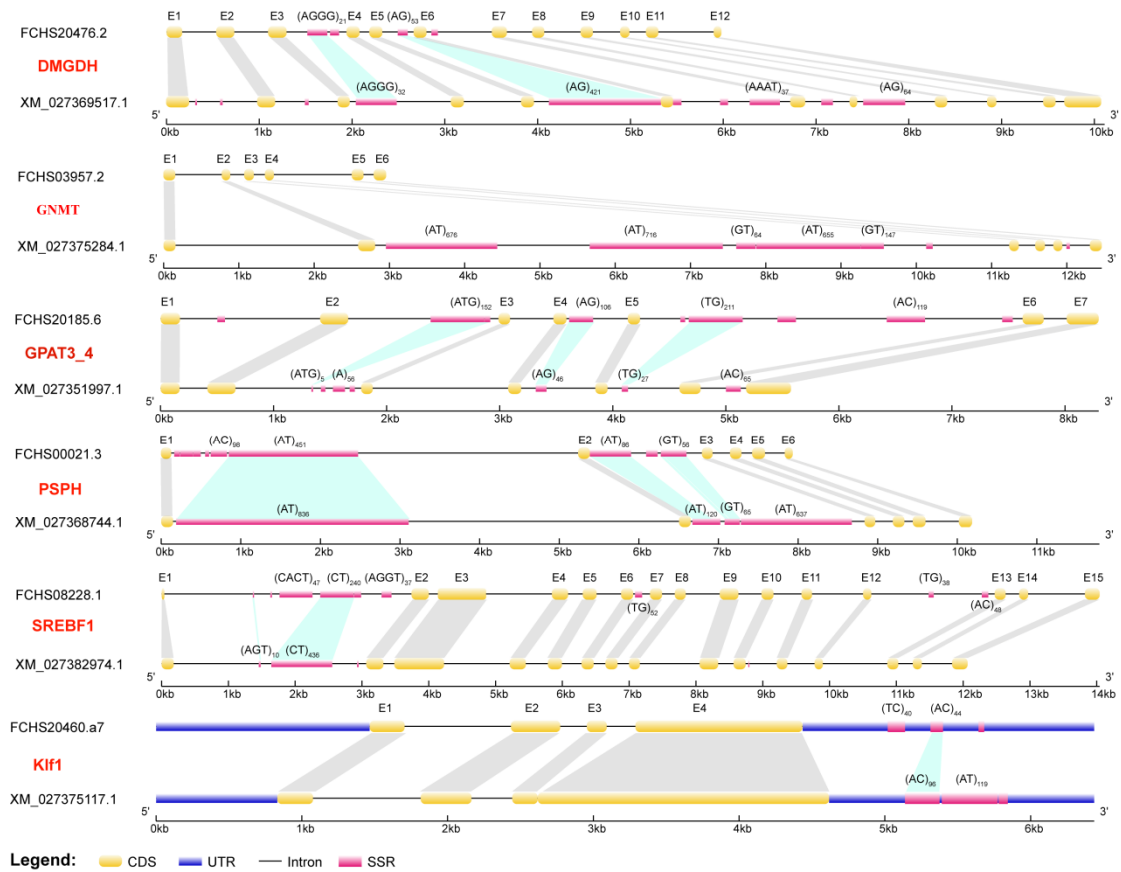

**Supplementary Figure 25. The synteny of the orthologous genes in the pathway of glycine, serine and threonine metabolism between the two shrimp species.**

The orthologous genes between *F. chinensis* and *L. vannamei* showed highly synteny in exons and some SSRs in introns. However, most of the SSRs in the gene body showed significant differences between the two shrimp species in all of these orthologous genes. SSR elongation and insertion could be detected when comparing the orthologous genes. Even for the genes with no SSR inserted in gene body (*Kif1*), the SSRs located in the up- or downstream showed some differences.



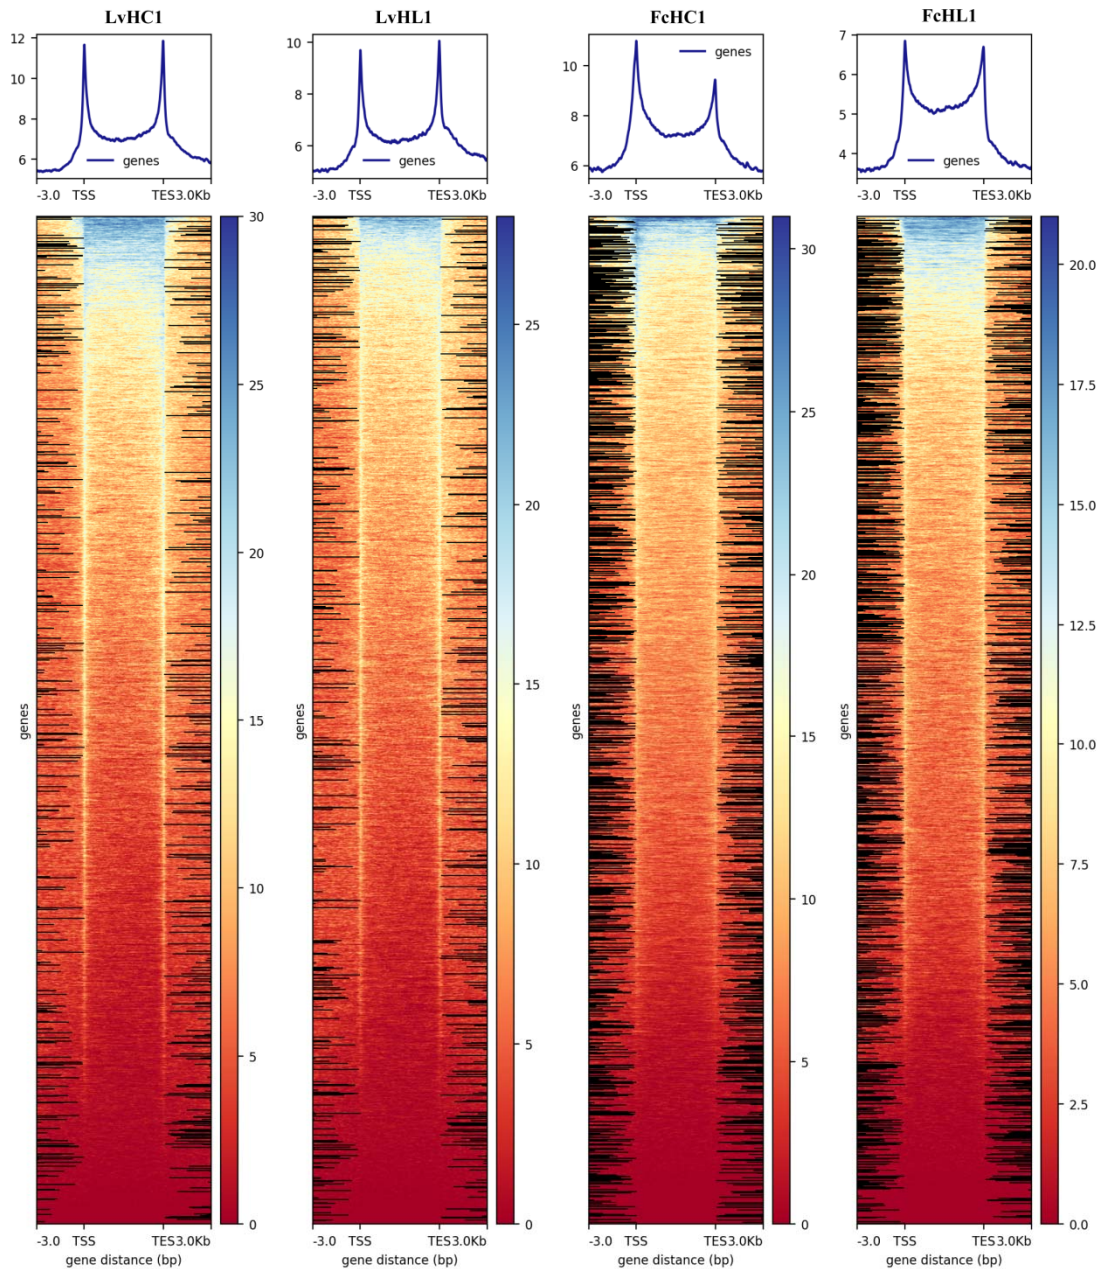

**Supplementary Figure 26. The ATAC-seq mapping depth of the gene body and promoter.**

The ATAC-seq reads mapping depth was calculated for each gene, and the upstream 3 Kb was considered as the promoter region. The bar of the heatmap indicates the average sequencing depth for the corresponding region. Generally, the sequencing depth was relatively higher around the transcription start site (TSS) and transcription end site (TES) than other regions.



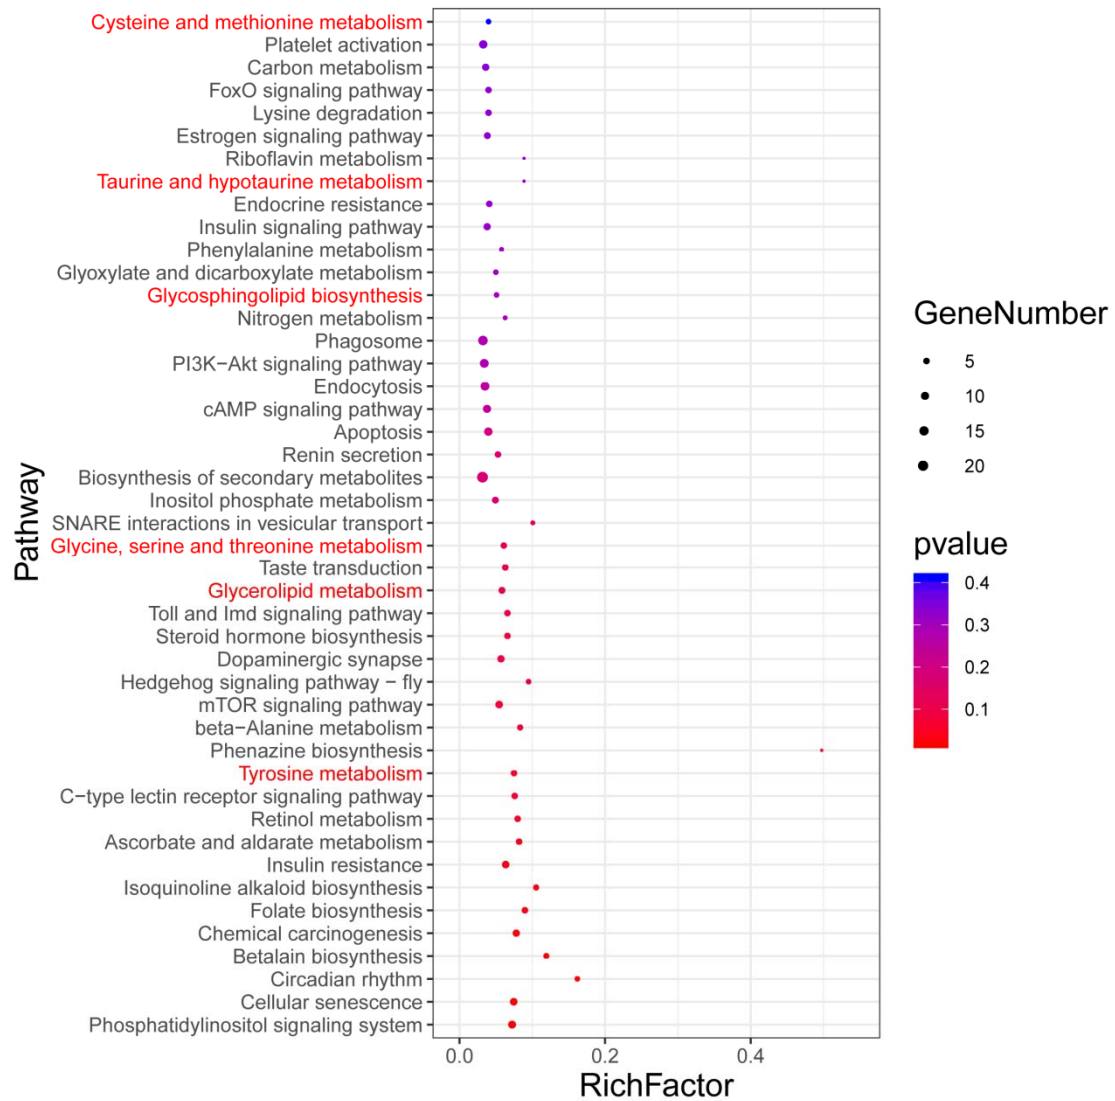

**Supplementary Figure 27. The KEGG enrichment of the genes around differential ATAC peaks under low-salinity stress in ATAC-seq analysis of *L. vannamei*.**

The KEGG terms in red colour were related to amino acid or lipid metabolism.

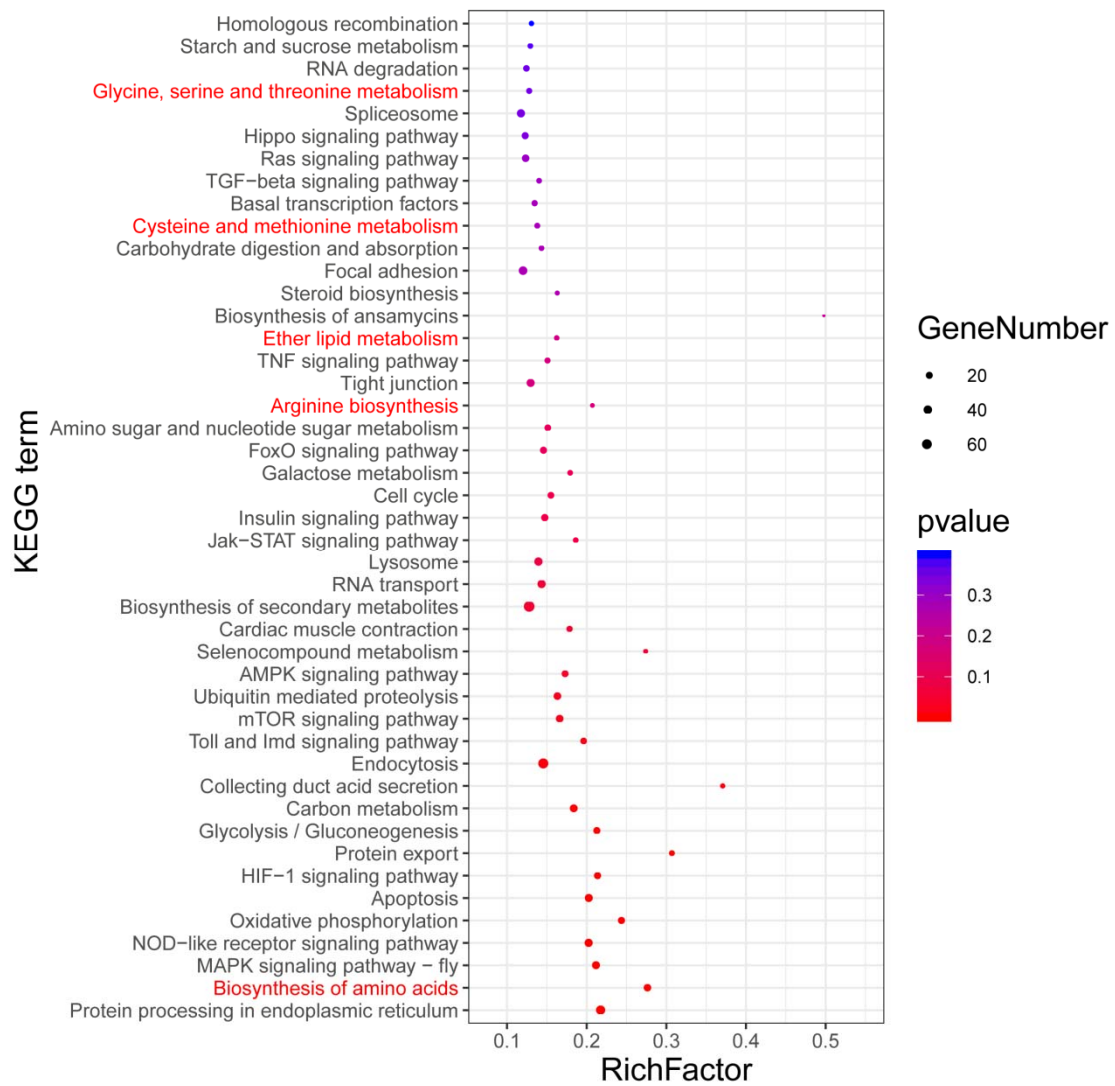

**Supplementary Figure 28. The KEGG enrichment of the genes around differential peaks under low-salinity stress in ATAC-seq analysis of *F. chinensis*. The KEGG terms in red colour were related to amino acid or lipid metabolism.**

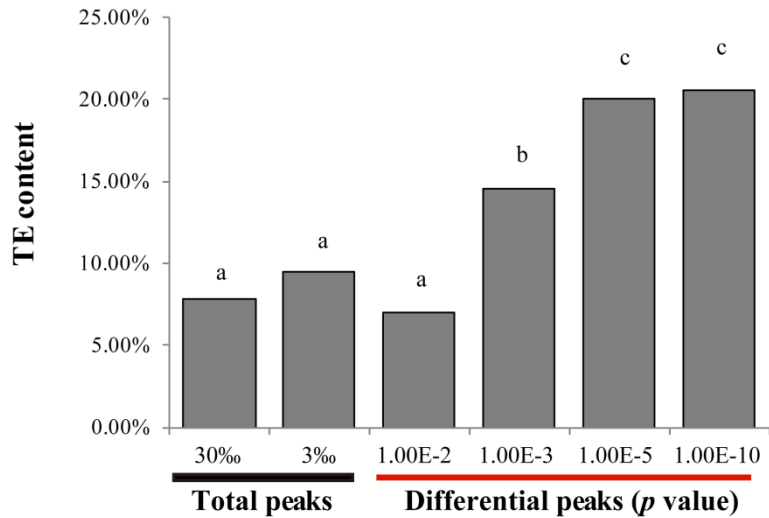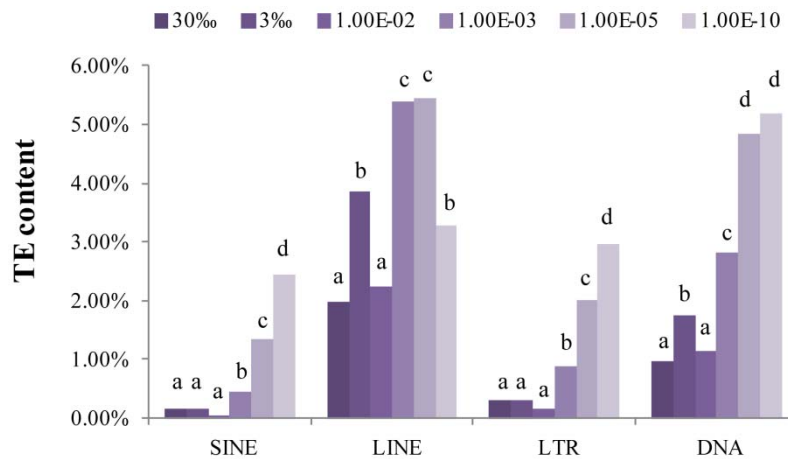

**Supplementary Figure 29. TE contents in all identified peaks at 3% and 30% salinity and only the differential peaks (3% vs. 30%) identified by ATAC-seq.**

The differential peaks were identified according to various  $p$  values from differential analyses of ATAC-seq.

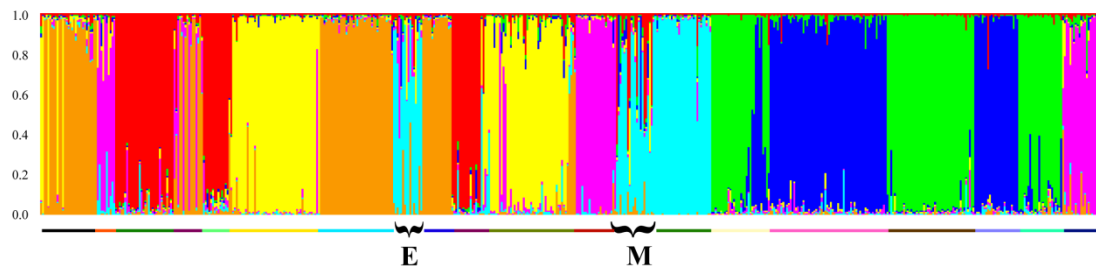

**Supplementary Figure 30. The SSR polymorphism of different aquaculture populations of *L. vannamei*.**

The SSR length was in highly polymorphism among different aquaculture populations (the line in various colour). E (Ecuador) and M (Mexico) were two wild-type populations.

## Supplementary Tables

**Supplementary Table 1. Statistics of Illumina sequencing data.**

| <b>Insert Size</b> | <b>Reads Length</b> | <b>DATA</b>            | <b>Coverage(×)*</b> |
|--------------------|---------------------|------------------------|---------------------|
| 137                | 100_100             | 94,604,750,700         | 50.32               |
| 170                | 100_100             | 138,076,681,910        | 73.45               |
| 300                | 100_100             | 37,794,515,928         | 20.10               |
| 500                | 100_100             | 92,431,394,740         | 49.17               |
| 800                | 100_100             | 38,810,731,180         | 20.64               |
| 2K                 | 100_100             | 54,624,761,456         | 29.06               |
| 5K                 | 100_100             | 56,626,085,318         | 30.12               |
| 10K                | 100_100             | 54,827,238,750         | 29.16               |
| 12K                | 100_100             | 32,225,310,452         | 17.14               |
| 17K                | 100_100             | 61,182,902,250         | 32.54               |
| <b>Total</b>       | <b>Total</b>        | <b>661,204,372,684</b> | <b>351.70</b>       |

\* Genome size ~1.88 Gb

**Supplementary Table 2. Statistics of PacBio sequencing data.**

| <b>Library</b> | <b>Subreads</b>   | <b>Bases</b>           | <b>Mean length</b> | <b>N50</b> | <b>Coverage (×)*</b> |
|----------------|-------------------|------------------------|--------------------|------------|----------------------|
| Fch-1          | 5,395,181         | 33,912,972,799         | 5,599              | 7,903      | 18.04                |
| Fch-2          | 1,897,785         | 27,045,851,467         | 6,241              | 7,988      | 14.39                |
| Fch-3          | 5,246,050         | 45,292,685,264         | 8,633              | 11,997     | 24.09                |
| <b>Total</b>   | <b>12,539,016</b> | <b>106,251,509,530</b> |                    |            | <b>56.52</b>         |

\* Genome size ~1.88 Gb

**Supplementary Table 3. Statistics of Hi-C sequencing data.**

| <b>Species</b>      | <b>Total Base (bp)</b> | <b>Q20(%)</b> | <b>Q30(%)</b> | <b>Coverage (X)</b> |
|---------------------|------------------------|---------------|---------------|---------------------|
| <i>F. chinensis</i> | 438,526,673,100        | 92.99         | 86.08         | 233.26              |
| <i>L. vannamei</i>  | 511,576,000,000        | 93.48         | 87.16         | 196.76              |

\* Genome size of *F. chinensis* is about 1.88 Gb, and Genome size of *L. vannamei* is about 2.60 Gb

**Supplementary Table 4. Comparison of the two shrimp genome assemblies.**

|                  | <i>F. chinensis</i> |               | <i>L. vannamei</i> |               |
|------------------|---------------------|---------------|--------------------|---------------|
|                  | Number              | Size          | Number             | Size          |
| Total contigs    | 49,957              | 1,554,960,535 | 50,304             | 1,618,026,442 |
| Longest contig   |                     | 829,035       |                    | 739,419       |
| Contig N50       | 42,892              | 58,996        | 42,878             | 57,650        |
| Contig N90       | 21,519              | 13,999        | 20,331             | 14,641        |
| Total scaffolds  | 8,768               | 1,581,129,620 | 28,409             | 1,631,536,563 |
| Longest scaffold |                     | 45,805,217    |                    | 47,298,368    |
| Scaffold N50     | 22                  | 28,916,617    | 21                 | 31,296,514    |
| Scaffold N60     | 28                  | 25,750,730    | 27                 | 27,178,000    |
| Scaffold N70     | 34                  | 22,083,550    | 33                 | 23,191,203    |
| Scaffold N80     | 77                  | 147,111       | 41                 | 17,560,698    |
| Scaffold N90     | 1,744               | 66,757        | 5,575              | 63,975        |

**Supplementary Table 5. Illumina reads coverage on the *F. chinensis* genome.**

|        |                            |             |
|--------|----------------------------|-------------|
|        | Number of clean reads      | 981,748,772 |
| Reads  | Percentage of mapped reads | 91.12%      |
|        | Percentage of Paired reads | 85.70%      |
|        | Coverage (%)               | 82.46%      |
|        | Coverage at least 5× (%)   | 75.34%      |
| Genome | Coverage at least 10× (%)  | 70.91%      |
|        | Coverage at least 20× (%)  | 64.54%      |
|        | Coverage at least 50× (%)  | 46.47%      |

**Supplementary Table 6. Unigene coverage on the *F. chinensis* genome.**

| Unigenes            | Number | Percent |
|---------------------|--------|---------|
| Total unigenes      | 64,708 | 100%    |
| Matched unigenes    | 61,360 | 94.83%  |
| 90% in one scaffold | 40,156 | 62.06%  |
| 50% in one scaffold | 54,554 | 84.31%  |

**Supplementary Table 7. Assessment the genome coverage of *F. chinensis* using BUSCO.**

|                                 |              |
|---------------------------------|--------------|
| Complete BUSCOs                 | 891 (83.58%) |
| Complete and single-copy BUSCOs | 785 (73.63%) |
| Complete and duplicated BUSCOs  | 106 (9.94%)  |
| Fragmented BUSCOs               | 97 (9.10%)   |
| Missing BUSCOs                  | 78 (7.31%)   |
| Total BUSCO groups searched     | 1066(100%)   |

**Supplementary Table 8. Macrosynteny between the genome assembly by Hi-C data and linkage maps of *L. vannamei*.**

| LG   | HIC | Length   | MakerNum |
|------|-----|----------|----------|
| LG34 | 1   | 43094143 | 147      |
| LG23 | 2   | 17230118 | 33       |
| LG19 | 5   | 34381183 | 133      |
| LG11 | 6   | 28891236 | 87       |
| LG2  | 7   | 17803676 | 51       |
| LG14 | 8   | 44804749 | 17       |
| LG15 | 8   | 44804749 | 152      |
| LG17 | 9   | 36257752 | 133      |
| LG43 | 10  | 36244676 | 125      |
| LG39 | 11  | 21561385 | 46       |
| LG8  | 12  | 17560698 | 46       |
| LG31 | 13  | 37747505 | 130      |
| LG25 | 15  | 42416622 | 132      |
| LG4  | 16  | 29400107 | 51       |
| LG24 | 17  | 17562319 | 64       |
| LG18 | 18  | 26453084 | 73       |
| LG9  | 19  | 36891603 | 144      |
| LG29 | 21  | 42707934 | 157      |
| LG28 | 22  | 37147500 | 116      |
| LG20 | 23  | 47298368 | 155      |
| LG16 | 24  | 37504298 | 128      |
| LG5  | 25  | 21631114 | 66       |
| LG6  | 26  | 29425547 | 72       |
| LG36 | 27  | 27178000 | 105      |
| LG3  | 28  | 32672231 | 119      |
| LG26 | 29  | 33855442 | 87       |
| LG35 | 30  | 24502028 | 80       |
| LG41 | 31  | 23191203 | 81       |

|      |    |          |     |
|------|----|----------|-----|
| LG33 | 32 | 22018822 | 61  |
| LG13 | 33 | 32300476 | 139 |
| LG7  | 35 | 26185043 | 61  |
| LG38 | 36 | 37020464 | 69  |
| LG21 | 37 | 29118703 | 22  |
| LG22 | 37 | 29118703 | 88  |
| LG27 | 38 | 26456696 | 100 |
| LG40 | 39 | 37974538 | 127 |
| LG1  | 40 | 23323404 | 73  |
| LG32 | 41 | 40728778 | 127 |
| LG42 | 42 | 39728044 | 142 |
| LG10 | 43 | 31540936 | 108 |
| LG12 | 44 | 22423333 | 69  |
| LG1  | 45 | 30003605 | 119 |
| LG30 | 47 | 21067011 | 68  |
| LG44 | 49 | 36011199 | 140 |
| LG37 | 51 | 31296514 | 103 |

**Supplementary Table 9. Comparison of gene structures between the two shrimp species.**

| Gene structure             | <i>F. chinensis</i> | <i>L. vannamei</i> |
|----------------------------|---------------------|--------------------|
| Gene number                | 26,343              | 25,596             |
| Gene average length (bp)   | 7,312               | 8,889              |
| Gene Max length (bp)       | 269,656             | 329,769            |
| Gene Min length (bp)       | 150                 | 165                |
| CDS average length (bp)    | 1,294               | 1,546              |
| CDS Max length (bp)        | 24,525              | 35,259             |
| CDS Min length (bp)        | 150                 | 160                |
| Exon number per gene       | 5.77                | 5.94               |
| Exon average length (bp)   | 224.13              | 259.95             |
| Intron average length (bp) | 1260.25             | 1483.77            |

**Supplementary Table 10. Summary of repetitive sequences.**

| <b>Repeats</b>    | <b><i>F. chinensis</i></b> | <b><i>L. vannamei</i></b> | <b><i>E. sinensis</i></b> | <b><i>P. virginalis</i></b> |
|-------------------|----------------------------|---------------------------|---------------------------|-----------------------------|
| Genome length     | 1.57 Gb                    | 1.66 Gb                   | 1.56 Gb                   | 3.29 Gb                     |
| Repeats           | 48.58%                     | 49.39%                    | 35.57%                    | 26.59%                      |
| <b>DNA</b>        | <b>13.00%</b>              | <b>9.33%</b>              | <b>2.30%</b>              | <b>0.62%</b>                |
| DNA/Academ        | 0.00%                      | 0.01%                     | 0.00%                     | 0.00%                       |
| DNA/En-Spm        | 10.08%                     | 6.39%                     | 0.82%                     | 0.01%                       |
| DNA/Ginger        | 0.00%                      | 0.00%                     | 0.01%                     | 0.00%                       |
| DNA/MuDR          | 0.46%                      | 0.64%                     | 0.03%                     | 0.00%                       |
| DNA/Maverick      | 0.87%                      | 0.80%                     | 0.10%                     | 0.07%                       |
| DNA/Merlin        | 0.02%                      | 0.00%                     | 0.01%                     | 0.00%                       |
| DNA/P             | 0.05%                      | 0.02%                     | 0.08%                     | 0.00%                       |
| DNA/Sola          | 0.20%                      | 0.06%                     | 0.00%                     | 0.00%                       |
| DNA/TcMar-Mariner | 0.12%                      | 0.06%                     | 0.00%                     | 0.00%                       |
| DNA/TcMar-Tc1     | 0.10%                      | 0.03%                     | 0.02%                     | 0.00%                       |
| DNA/TcMar-Tigger  | 0.00%                      | 0.04%                     | 0.32%                     | 0.34%                       |
| DNA/hAT           | 0.04%                      | 0.01%                     | 0.09%                     | 0.00%                       |
| DNA/hAT-Charlie   | 0.14%                      | 1.00%                     | 0.09%                     | 0.03%                       |
| DNA/hAT-hAT5      | 0.00%                      | 0.02%                     | 0.00%                     | 0.00%                       |
| <b>LINE</b>       | <b>3.27%</b>               | <b>2.82%</b>              | <b>9.72%</b>              | <b>9.52%</b>                |
| LINE/CR1          | 0.14%                      | 0.25%                     | 4.06%                     | 5.99%                       |
| LINE/I            | 0.84%                      | 0.23%                     | 0.10%                     | 1.10%                       |
| LINE/Jockey       | 0.09%                      | 0.06%                     | 0.05%                     | 0.29%                       |
| LINE/L2           | 0.17%                      | 0.35%                     | 0.36%                     | 0.71%                       |
| LINE/LOA          | 0.04%                      | 0.30%                     | 0.00%                     | 0.00%                       |
| LINE/Penelope     | 0.51%                      | 0.45%                     | 0.04%                     | 0.74%                       |
| LINE/R2           | 0.10%                      | 0.01%                     | 0.00%                     | 0.00%                       |
| LINE/RTE-BovB     | 0.99%                      | 0.77%                     | 0.91%                     | 0.12%                       |
| LINE/RTE-RTE      | 0.35%                      | 0.15%                     | 0.07%                     | 0.05%                       |
| LINE/Rex-Babar    | 0.05%                      | 0.04%                     | 0.11%                     | 0.00%                       |
| <b>SINE</b>       | <b>0.11%</b>               | <b>0.06%</b>              | <b>0.29%</b>              | <b>0.80%</b>                |
| <b>LTR</b>        | <b>0.53%</b>               | <b>0.62%</b>              | <b>1.79%</b>              | <b>2.50%</b>                |
| LTR/Copia         | 0.00%                      | 0.00%                     | 0.00%                     | 0.00%                       |
| LTR/ERV1          | 0.00%                      | 0.02%                     | 0.01%                     | 0.00%                       |
| LTR/Gypsy         | 0.22%                      | 0.08%                     | 1.28%                     | 0.79%                       |
| <b>Unknown</b>    | <b>3.52%</b>               | <b>3.42%</b>              | <b>10.39%</b>             | <b>12.33%</b>               |
| Satellite         | 0.16%                      | 0.10%                     | 0.00%                     | 0.04%                       |
| Simple_repeat     | 19.50%                     | 23.93%                    | 6.90%                     | 0.41%                       |
| Low_complexity    | 8.49%                      | 9.49%                     | 2.04%                     | 0.33%                       |



**Supplementary Table 11. Simple sequence repeats in different species\*.**

|                                | <b>Species</b>         | <b>Common name</b>    | <b>Percent (%)</b> |
|--------------------------------|------------------------|-----------------------|--------------------|
| <b>Plants</b>                  | <i>B. distachyon</i>   | Purple false brome    | 1.89               |
|                                | <i>S. bicolor</i>      | Sorghum               | 2.49               |
|                                | <i>O. sativa</i>       | Asian rice            | 2.9                |
|                                | <i>Z. mays</i>         | Maíz                  | 0.86               |
|                                | <i>A. thaliana</i>     | Thale cress           | 0.45               |
|                                | <i>T. urartu</i>       | Einkorn wheat         | 1.21               |
| <b>Vertebrates</b>             | <i>F. peregrinus</i>   | Peregrine             | 0.01               |
|                                | <i>D. rerio</i>        | Zebrafish             | 0.28               |
|                                | <i>L. crocea</i>       | Large yellow croaker  | 1.72               |
|                                | <i>M. musculus</i>     | Mouse                 | 1.56               |
|                                | <i>T. rubripes</i>     | Tiger puffer          | 1.74               |
|                                | <i>H. sapiens</i>      | Human                 | 0.84               |
| <b>Insects</b>                 | <i>B. mori</i>         | Silkworm              | 0.47               |
|                                | <i>L. migratoria</i>   | Locust                | 0.2                |
|                                | <i>D. melanogaster</i> | Fruit fly             | 1.08               |
|                                | <i>A. gambiae</i>      | Mosquitoes            | 1.08               |
|                                | <i>P. humanus</i>      | Human lice            | 10.52              |
|                                | <i>A. mellifera</i>    | Cape honey bee        | 1.92               |
| <b>Other<br/>invertebrates</b> | <i>C. elegans</i>      | Roundworm             | 0.35               |
|                                | <i>H. robusta</i>      | Leech                 | 6.36               |
|                                | <i>C. teleta</i>       | Polychaete            | 1.09               |
|                                | <i>C. gigas</i>        | Pacific oyster        | 0.72               |
|                                | <i>L. gigantea</i>     | Owl limpet            | 0.55               |
|                                | <i>L. vannamei</i>     | Pacific white shrimp  | 23.93              |
|                                | <i>D. pulex</i>        | Water flea            | 0.78               |
|                                | <i>I. scapularis</i>   | Blacklegged ticks     | 0.54               |
|                                | <i>T. castaneum</i>    | Beetle                | 0.24               |
|                                | <i>S. maritima</i>     | Centipede             | 0.80               |
|                                | <i>T. urticae</i>      | Mite                  | 0.32               |
|                                | <i>N. vectensis</i>    | Sea Anemone           | 0.58               |
| <b>Fungi</b>                   | <i>N. crassa</i>       | Red bread mold        | 0.82               |
|                                | <i>S. cerevisiae</i>   | Yeast                 | 0.36               |
|                                | <i>T. pseudonana</i>   | Marine centric diatom | 0.23               |

\* This table was update from our previous work (Zhang et al., 2019).

**Supplementary Table 12. Comparison of SSRs among six crustacean genomes.\***

| <b>SSR</b> | <b>Fchi</b> | <b>Lvan</b> | <b>Esin</b> | <b>Pvir</b> | <b>Phaw</b> | <b>Dpul</b> |
|------------|-------------|-------------|-------------|-------------|-------------|-------------|
| A          | 0.36%       | 0.35%       | 0.14%       | 0.00%       | 0.02%       | 0.06%       |
| C          | 0.04%       | 0.04%       | 0.02%       | 0.19%       | 0.00%       | 0.02%       |
| AT         | 5.51%       | 10.21%      | 1.01%       | 0.01%       | 0.04%       | 0.01%       |
| GC         | 0.00%       | 0.00%       | 0.00%       | 0.00%       | 0.00%       | 0.00%       |
| AC         | 4.18%       | 4.76%       | 1.14%       | 0.05%       | 0.01%       | 0.06%       |
| AG         | 4.66%       | 4.53%       | 2.12%       | 0.02%       | 0.00%       | 0.07%       |
| AAT        | 1.45%       | 0.88%       | 0.38%       | 0.01%       | 0.04%       | 0.02%       |
| AAG        | 0.18%       | 0.15%       | 0.14%       | 0.00%       | 0.00%       | 0.08%       |
| AAC        | 0.07%       | 0.06%       | 0.07%       | 0.01%       | 0.00%       | 0.04%       |
| ATC        | 0.25%       | 0.17%       | 0.05%       | 0.00%       | 0.00%       | 0.01%       |
| AGG        | 0.41%       | 0.28%       | 0.50%       | 0.01%       | 0.00%       | 0.01%       |
| ACT        | 0.08%       | 0.07%       | 0.31%       | 0.00%       | 0.01%       | 0.01%       |
| ATAG       | 0.36%       | 0.43%       | 0.07%       | 0.00%       | 0.00%       | 0.00%       |
| ATAC       | 0.34%       | 0.31%       | 0.03%       | 0.00%       | 0.00%       | 0.01%       |
| AGGG       | 0.19%       | 0.23%       | 0.03%       | 0.00%       | 0.00%       | 0.00%       |
| ACAG       | 0.16%       | 0.14%       | 0.06%       | 0.00%       | 0.01%       | 0.00%       |
| AAAG       | 0.08%       | 0.12%       | 0.03%       | 0.00%       | 0.00%       | 0.01%       |
| AAAT       | 0.05%       | 0.09%       | 0.03%       | 0.01%       | 0.02%       | 0.01%       |
| AACCT      | 0.01%       | 0.07%       | 0.01%       | 0.02%       | 0.02%       | 0.01%       |
| AAACC      | 0.00%       | 0.00%       | 0.01%       | 0.00%       | 0.00%       | 0.00%       |
| AAAAG      | 0.02%       | 0.04%       | 0.05%       | 0.00%       | 0.00%       | 0.01%       |
| AGGGG      | 0.03%       | 0.03%       | 0.00%       | 0.00%       | 0.00%       | 0.00%       |
| AATGAT     | 0.07%       | 0.06%       | 0.00%       | 0.00%       | 0.00%       | 0.00%       |
| AGAGGG     | 0.06%       | 0.08%       | 0.00%       | 0.00%       | 0.00%       | 0.00%       |

\* The SSR content lower than 0.005% were shown as 0.00% in the table. The crustaceans used for analysis were *Fenneropenaeus chinensis* (Fchi), *Litopenaeus vannamei* (Lvan), *Eriocheir sinensis* (Esin), *Procambarus virginalis* (Pvir), *Parhyale hawaiiensis* (Phaw), *Daphnia pulex* (Dpul).

**Supplementary Table 13. The genome resources of penaeid shrimp species\*.**

| <b>Species</b>                   | <b>Read length</b> | <b>Total Bases</b> | <b>Accession ID</b>   |
|----------------------------------|--------------------|--------------------|-----------------------|
| <i>Fenneropenaeus chinensis</i>  | 100_100            | 138.08 Gb          | This study            |
| <i>Fenneropenaeus merguensis</i> | 100_100            | 671.9 Mb           | DRR122407             |
| <i>Fenneropenaeus indicus</i>    | 150_150            | 298.25 Gb          | SRR7983095-SRR7983101 |
| <i>Litopenaeus vannamei</i>      | 100_100            | 213.09 Gb          | (Zhang et al., 2019)  |
| <i>Marsupenaeus japonicus</i>    | 150_150            | 127.52 Gb          | SRR5620465,SRR5620466 |
| <i>Penaeus monodon</i>           | 150_150            | 127.30 Gb          | SRR5620467,SRR5620468 |
| <i>Metapenaeus ensis</i>         | 100_100            | 1.21 Gb            | DRR122410             |
| <i>Metapenaeus joyneri</i>       | 150_150            | 808.6 Mb           | DRR122411             |

\*The genome resources of these penaeid shrimps were downloaded from NCBI SRA database.

These data were paired-end reads that sequenced by Illumina platform. Unlike the other species belong to genus of *Penaeus*, *Metapenaeus ensis* and *Metapenaeus joyneri* are two species belong to the genus of *Metapenaeus*, which set as the control for the comparative analyses.

**Supplementary Table 14. The transcriptome data of the two shrimp species under low-salinity stress\*.**

| <b>Library</b> | <b>Clean Data(bp)</b> | <b>Q20(%)</b>        | <b>Q30(%)</b>        |
|----------------|-----------------------|----------------------|----------------------|
| Lv30‰-1        | 6540180266            | 6356157872 (97.19%)  | 6060403044 (92.66%)  |
| Lv30‰-2        | 7330527332            | 7135199179 (97.34%)  | 6823001829 (93.08%)  |
| Lv30‰-3        | 9929173692            | 9646161607 (97.15%)  | 9128378844 (91.93%)  |
| Lv9‰-1         | 6824579913            | 6616006093 (96.94%)  | 6242030064 (91.46%)  |
| Lv9‰-2         | 7121769862            | 6912915227 (97.07%)  | 6580523625 (92.40%)  |
| Lv9‰-3         | 8903596533            | 8596307550 (96.55%)  | 8070106756 (90.64%)  |
| Lv3‰-1         | 7285650546            | 7069634057 (97.04%)  | 6724836569 (92.30%)  |
| Lv3‰-2         | 6381343325            | 6188592202 (96.98%)  | 5840857071 (91.53%)  |
| Lv3‰-3         | 6180832598            | 5992036453 (96.95%)  | 5652077168 (91.45%)  |
| Fc30‰-1        | 5712801449            | 5550368175 (97.16%)  | 5251066243 (91.92%)  |
| Fc30‰-2        | 6971553491            | 6770648240 (97.12%)  | 6405750011 (91.88%)  |
| Fc30‰-3        | 7279236695            | 7087640931 (97.37%)  | 6742802818 (92.63%)  |
| Fc9‰-1         | 9757990404            | 9504971840 (97.41%)  | 9040327882 (92.65%)  |
| Fc9‰-2         | 8975262091            | 8740257669 (97.38%)  | 8311468741 (92.60%)  |
| Fc9‰-3         | 8263133206            | 8082615754 (97.82%)  | 7732612635 (93.58%)  |
| Fc3‰-1         | 9400226904            | 9153990360 (97.38%)  | 8707871370 (92.63%)  |
| Fc3‰-2         | 8603564274            | 8396738698 (97.60%)  | 8010229679 (93.10%)  |
| Fc3‰-3         | 10900184232           | 10653052050 (97.73%) | 10188486425 (93.47%) |

\*Comparative transcriptomics analyses were performed on both shrimp species under the salinity of 30‰, 9‰ and 3‰. Three replicates were conducted per salinity.

**Supplementary Table 15. The differentially expressed gene numbers in pairwise comparison of different levels of salinities.**

| Pair            | DiffGene(Up) | DiffGene(Down) | All DiffGene |
|-----------------|--------------|----------------|--------------|
| Lv_30‰-VS-Lv_9‰ | 1114         | 168            | 1282         |
| Lv_30‰-VS-Lv_3‰ | 743          | 713            | 1456         |
| Lv_9‰-VS-Lv_3‰  | 12           | 100            | 112          |
| Fc_30‰-VS-Fc_9‰ | 13           | 10             | 23           |
| Fc_30‰-VS-Fc_3‰ | 758          | 344            | 1102         |
| Fc_9‰-VS-Fc_3‰  | 2735         | 789            | 3524         |

**Supplementary Table 16. The differential expressed gene numbers in the pathways related to amino acid and lipid metabolisms.**

| Compare lib                                     | <i>L. vannamei</i> | <i>F. chinensis</i> |
|-------------------------------------------------|--------------------|---------------------|
| <b>Glycine, serine and threonine metabolism</b> |                    |                     |
| all*                                            | 51                 | 63                  |
| 30‰~3‰                                          | 11                 | 9                   |
| 30‰~9‰                                          | 8                  | 0                   |
| 9‰~3‰                                           | 4                  | 8                   |
| <b>Cysteine and methionine metabolism</b>       |                    |                     |
| all                                             | 48                 | 45                  |
| 30‰~3‰                                          | 5                  | 4                   |
| 30‰~9‰                                          | 4                  | 0                   |
| 9‰~3‰                                           | 6                  | 3                   |
| <b>Taurine and hypotaurine metabolism</b>       |                    |                     |
| all                                             | 8                  | 9                   |
| 30‰~3‰                                          | 4                  | 2                   |
| 30‰~9‰                                          | 1                  | 0                   |
| 9‰~3‰                                           | 0                  | 3                   |
| <b>Glycerolipid metabolism</b>                  |                    |                     |
| all                                             | 60                 | 61                  |
| 30‰~3‰                                          | 8                  | 3                   |
| 30‰~9‰                                          | 9                  | 1                   |
| 9‰~3‰                                           | 3                  | 2                   |
| <b>Glycerophospholipid metabolism</b>           |                    |                     |
| all                                             | 86                 | 79                  |
| 30‰~3‰                                          | 8                  | 8                   |
| 30‰~9‰                                          | 10                 | 0                   |
| 9‰~3‰                                           | 1                  | 5                   |

\* "all" indicates the total number of genes of the correspond pathways identified in the shrimp genomes.

**Supplementary Table 17. The clean reads and mapping reads of ATAC-seq.**

| <b>Sample</b> | <b>Clean reads</b> | <b>Mapping reads</b> | <b>Mapping rate (%)</b> |
|---------------|--------------------|----------------------|-------------------------|
| LvHC1         | 261,584,236        | 215,436,909          | 82.36%                  |
| LvHC2         | 247,117,160        | 188,863,104          | 76.43%                  |
| LvHL1         | 345,537,552        | 300,198,312          | 86.88%                  |
| LvHL2         | 193,377,110        | 168,814,603          | 87.30%                  |
| FcHC2         | 135,203,142        | 114,237,232          | 84.49%                  |
| FcHC1         | 183,498,426        | 157,804,231          | 86.00%                  |
| FcHL1         | 129,496,364        | 113,998,385          | 88.03%                  |
| FcHL2         | 155,839,756        | 136,117,711          | 87.34%                  |

**Supplementary Table 18. The ATAC peaks identified in the two shrimp genomes.\***

| <b>Sample</b> | <b>Peak number</b> | <b>Total length (bp)</b> | <b>Average length (bp)</b> |
|---------------|--------------------|--------------------------|----------------------------|
| LvHC1         | 300,000            | 195,357,243              | 651.19                     |
| LvHC2         | 300,000            | 191,071,458              | 636.9                      |
| LvHL1         | 300,000            | 149,052,689              | 496.84                     |
| LvHL2         | 300,000            | 178,886,046              | 596.29                     |
| FcHC2         | 300,000            | 203,608,308              | 678.69                     |
| FcHC1         | 300,000            | 172,695,793              | 575.65                     |
| FcHL1         | 300,000            | 174,325,187              | 581.08                     |
| FcHL2         | 300,000            | 186,439,215              | 621.46                     |

\* The top 300,000 peaks were selected for the following analyses.

**Supplementary Table 19. The differential ATAC peaks under low-salinity stress.\***

| <b>Peaks</b> | <b><i>L. vannamei</i></b> | <b><i>F. chinensis</i></b> |
|--------------|---------------------------|----------------------------|
| 30‰          | 98,967                    | 106,314                    |
| 3‰           | 112,604                   | 149,442                    |
| 1.00E-02     | 60,513                    | 86,922                     |
| 1.00E-03     | 17,258                    | 21,587                     |
| 1.00E-05     | 3,291                     | 4,294                      |
| 1.00E-10     | 575                       | 1,588                      |

\* 30‰ and 3‰ indicates the total peaks identified in the control and low-salinity samples. 1.00E-02 to 1.00E-10 indicates the differential peak numbers with *p* value lower than 1.00E-02 to 1.00E-10.
